# Supplementary material for: Transforming a fragile protein helix into an ultrastable scaffold via a hierarchical AI and chemistry framework
Source: eLife. 2026 Apr 2;15:RP109753. doi: 10.7554/eLife.109753 (PMC13046381; doi:10.7554/eLife.109753)
Supplement: Source data 1. [file elife-109753-data1.xlsx]

## Sheet: Sheet1
Number	Name(SpecAI_StructureID_SequenceID)	Short Name	Sequence	RMSD(AlphaFold2)	pLDDT(AlphaFold2)	Mean_rSASA	Core_Ratio(rSASA<0.2)	1 nm/ns SMD_1	1 nm/ns SMD_2	1 nm/ns SMD_3	SMD_avg	SMD_stdv	Select for experiment
——	Spectrin_WT(PDB ID:3F57 )	——	SYDLHRYFYTGAEILGLIDEKHRELPEDVGLDASTAESFHRVHTAFERDVHLLGVQVQQFQDVATRLQTAYAGEKAEAIQNKEQEVSAAWQALLDACAGRRT	——	——	0.402378	0.2353	551.095	668.643	576.242	598.66	61.8975	——
35	SpecAI_78_87788	SpecAI88	KEEEILNWVKEFKEFWEWLAKRTKELAEDKVEDTGDPEAAREKQFEELLKEQEEREPLWEKLKEKTEELKKLNHPLYKELVKLAEFAEEVWELFKELFDYFKERQKLKAEGAPQEEIDKAKAKEEAALQKLKDIAPEVEKRKEELEKVVEEILK	0.843354	92.7522	0.342153	0.3442	649.545	747.659	807.784	734.996	79.8761	√
172	SpecAI_78_16941	SpecAI41	EEEKIKQWVKDFKEYFDWLAERTAELAADVVEDTGDPEAAREAREEELEKEFEEKKPIREKLEKEAEKLKKLNHPLYKELVEYAEYAKEIWALFEALFEARAKLKELKAKGAPKAEIDAAQAKRDAALAELKAKAPEVEAKRAKVEKVVEKILK	1.27056	91.034	0.369154	0.3247	785.547	628.073	654.633	689.417	84.3031	√
317	SpecAI_78_95889	SpecAI89	SEKEIQEWVKEFKDAFDKLVERTEEIAADKVEPTGDPEKARDAKEEELLKEFEEFKPKREKLLKKAEKLKELNHPLYEKLVELSEFFEEQWALFEKYFAAFKKLKALKAEGAPQEEIDKARAERDAALAEIQAKAPEVKAKKEELDKVVEEILK	1.18836	91.1919	0.354437	0.3377	722.799	573.073	713.246	669.706	83.8224	√
161	SpecAI_78_73038		KEEEIKQFVIDFNKFFNWVVDKIKEYAEDKVEDTGDPEAAREKQEEKLLEELKEKEPKFKELKEKAKELKKLNHPLFKELVKLSEFLEEQWELIKKLAEAFQKLKELKAKGAPKAEIEAAKAKRDAALEEIKAKAPEAEAKKKEAEEVVKKILK	1.27013	91.7067	0.357806	0.3312	654.04	730.453	623.157	669.217	55.2345
184	SpecAI_78_17971		SEKEIQKFVEDFEKFWTWLVDRTAELAADPVAPTGNPAAARAAQEAALAEEEKKREPEWKKLKEKLKELAKLNHPLYKELVKLGEFAEEVWELFKRLFEARAALEAAKAAGAPAAERAALAAARDAALAELRARAPEVAARDKELKAVVAKIKA	1.13324	91.9918	0.36951	0.2922	765.009	557.121	679.865	667.332	104.509
284	SpecAI_78_67527		KEEEIKQFVIDFNEFFDWLAERTKEIAEDKVEDTGDPEKEREKKMEEFLKEKKEKKPKFEKLKEKMKELKELNHPLYKELVKISEFMEKVWELFEELFKAYEKYKELKAKGGPKEEIEKAKKKMEEKKKELKEIAPEVEAKREEAKKVVDKILK	1.28515	90.8999	0.349153	0.3442	683.429	724.505	593.789	667.241	66.8449
81	SpecAI_78_52514		SEEEKKEWVVEFEKFWKWLVEKTKEIAADKVEDTGDPAAARAKKRDKLAEEFKKLEPLRKRLKEKSKELEKENHPLYKELVKLSKFAEEIWALFEKYFAAFAKLKALKAAGAPAAEIAAAAAALAAAEAELKAKAPEVEEKEKELKEVVEKILK	0.965349	91.5091	0.358734	0.3571	718.941	668.157	601.687	662.928	58.8016
234	SpecAI_60_99749		SVREFARRFKEFYDWILKTLEELKEFKVEPSGDEIKEVFKKLDELKKELEEKKPEFEELLERAEELAELDKPEYRVIVELVELVKKLWEALEKLFKEFEELKEKLKKGEITLEEAYKLFLEKLKEIEEENKEVYEELKKILPEAEKAIAKILA	1.7504	93.3801	0.33352	0.3333	654.158	699.798	634.059	662.671	33.6864
39	SpecAI_78_95754		EEEERKQFVVDFEEFWDWLAELTKEIAENKVEDTGDPEAAIEKKYEELLKKFKEKEPIFEELAKKAEELKKLDHPLYKKLVELFEYAKEVWELFKELFKAFKELKALKAKGAPKEEQDKALAKMKAAEQKLKDIAPEVEAKREELKKVVAEILA	0.937395	90.5412	0.350282	0.3312	608.697	690.235	684.395	661.109	45.4837
169	SpecAI_60_14551		EVKQFAKDFKEYSDWLDERLKELEENPVEESGNPAAAVFERLDKLLEKLKEKEPKFKELKEKAKELKKLDKPEYKVIVEEFELNEKIWEMFKELAERVAELKAKLAAGEISEEEALARLREKLEELKKKNEEVFKKREEIKPEADKAIKKIIA	1.96327	90.9346	0.346844	0.3399	625.388	609.418	745.675	660.16	74.4874
202	SpecAI_78_65078		KEEEIKEFVKEFKEFFNKLAEYTKEIAEDKVEDTGDPEAARAAKEDKWLEEKKKLKPKFEKLKKKAEELKKLNDELFKELVELFEFAVEVWELFEKRFAAYEKIKKLKAEGAPQEEIDAAEAEYKAVKAKLKALAPEVEEKLKKLEEVVEKILK	0.901842	90.3693	0.356389	0.3377	686.981	646.847	641.301	658.376	24.927
331	SpecAI_78_45365		EEEEIRQFVVDFRDYFDWLAAKTAEIAADKVEDTGNPAAARAKKLAALAEEQKKRKPVFKELKEKAEKLKELNHPLYKKLVEHFEYAVEVQEKFDAMFAAAAKLKALKAAGAPAAERAAAAAKLKAAREELKAMAPEVAARKAELDAVVAEILA	0.911901	90.6837	0.375915	0.3052	685.909	720.209	568.743	658.287	79.4214
294	SpecAI_78_36132		SEEEIKEFVKEFNEFFKKLVEKTKEIAEDKVEDTGDPEAARAEKEEELLKEMKELEPKFEELMEKAEKLKELDSPLYKELVKIAEKAKEIWDLFKKYFAAFEELKKLEAEGAPAAERAAARAEREAVHAELKARAPEVEALEKELKEVVAKILA	0.995834	92.1825	0.36119	0.3636	683.203	649.194	634.864	655.754	24.8281
324	SpecAI_78_67456		KEEEIKQFVVEFKEFWDWLAATTAALAENPVAPTGDPEAARAAQFDVLLAEQKEREPKKKELFEKAEELKKLNHPLYKKLVELSKFAKEVWDKFEKLFAAYEELKALKAKGAPAEEIAKAKAEMEAALAELQAMAPEVAARRKELDEVVAEILA	1.1982	92.2679	0.35995	0.3377	770.959	601.571	590.074	654.201	101.278
198	SpecAI_78_1957		EEEKLKEFVKEFKEFFDWLAARTAEIAADPVAPTGDPAAARAARLAALAAEREERKPLWEKLKKEAEELEKKDHPLYKKLVELFKFAEEVWELFDALAAAFARLRALEAAGAPAEERAAAAAALAAARAELRALAPEVEARKKELEEVVEKILK	1.91407	91.5064	0.354708	0.3182	687.529	608.085	665.326	653.647	40.9898
14	SpecAI_60_19224		DLKEFAKKFKEFSEWLEEREKELKEFKIEPSGDPVAELFKKLDELLKEFEERKPIFEELKKQAEELKKLNHPKYKVIVKQAELDEKIWERFEELFKFYKELKKKLESGEITKEEAGKLLLEKVKELEEKYEEVFKEREEVKPEAEKAIEEIIK	1.2769	92.3686	0.345648	0.3464	714.532	638.444	600.84	651.272	57.9212
205	SpecAI_78_72829		SAAELQQFVKDFEKYWTWLAETTAEFAANKVEDTGDPEKALEAKEDKLLEEMKKREPERKKLEEKAKELKELDDPLYKKLVELWEFAKEVWALFEKYAAAYEKIKELKAKGAPKEEIDAAKAARDAALAEIQARAPEVEARAKELKAVAAEILA	0.974147	92.0665	0.364978	0.3506	589.473	657.71	704.949	650.711	58.0555
24	SpecAI_78_18481		SEEEIKEFVIEFYEFWKWLVERTKLIAEDPVEPTGDPEAARRARMEKLLKEHEERKPKKEELAKKAEELKKLNHPLYKKLVKFFEKAKEVWALFDKLFAAYERLQKLEAEGGPQAEIDKARAEMDAAIAELKARAPEVEELEKEVEKVVEEILA	0.828786	91.9438	0.356721	0.3506	643.542	653.588	653.515	650.215	5.77928
300	SpecAI_78_79015		EEEKLKEFVKKFEEFFNWLVEKTKEIAADKVEDTGDPEAARAEQFAKLLEEQKERKPIFEELMKEAEELKKKNHPLYKKLVEISEKAKEVWALFEELFAAFEEIQKLKAEGAPQAEIDAARAKRDAALAKLKSIAPEVEKLEKELKKVVEEILK	0.894663	90.2376	0.347414	0.3701	648.854	600.986	699.114	649.652	49.0686
147	SpecAI_78_84644		ESKKIQEFVKEFKEFFNWLAERTEEIAEDKVEDTGDPEAARRAKLKEYLKEMEELKPKKEELKKKAEELEKLNHPLYKKLVELFKFMEEVWEKFEKLFAAFKELEKLKAEGGPQAEIDAARAKMEAARKELREMAPEVKERKEELEKVVKEILE	1.13982	90.7184	0.342251	0.3701	745.43	592.544	610.89	649.621	83.4782
200	SpecAI_78_44149		EEEELKKFVVEFNEFFEWLAEKTKEFAENKVEESGDPEAELDKKLDKLAAEAEEKAPLFERLLEKAEKLKELDDPLYKELVELAEFAREVWEKFKALLAAHAALKALLAAGAPADEIAAARAKRDAALAELQAMAPEVEKRLEKLKRVVEEILK	1.35347	92.5253	0.363031	0.3247	640.624	609.625	692.869	647.706	42.0715
148	SpecAI_78_47354		KEEEIKQFVKEFKEYWEWAAEKTKEFAEDKVEDTGDPAAAREKKLEELLKEYEEKKPKFEELKKKLKELKKLNHPLYKKLVELGEYLEEVWKEFEELFKAFKELKKLKAEGAPKEEIDAAKAKMDAAHAKIKAMAPEVEEREKELKEVVEKILK	0.964893	90.2673	0.348154	0.3636	679.558	638.479	623.969	647.335	28.833
302	SpecAI_78_27484		KEEELKQWVVDFEEYFNWLVERTEELAADPVEPTGDPEAAREERFKKLLEEAKEREPKFKELMKKTEEVKELKDPLFEKLVELAEYAKEVWELHKKLFEAFEKLQELKASGAPQEELEKARAKRDAALAELKARAPEVKAKLEELKKVVAEILA	1.09155	92.1445	0.353002	0.3636	695.352	568.328	677.448	647.043	68.7545
264	SpecAI_78_6187		EEEKKKEFVKKFNEFFNWLAEETEEVAKNVVEDTGDPEAARAKQEAERLAKLKEREPIFKELMKEAEELKKENNPLYEKLVEFSEYMKEIWKLFKERAAAFKKLQALKAAGAPKAEIEAAKAAYDAALKKLQDEKPKVEEKKKEVEKVVKEILS	1.11432	91.0272	0.358596	0.3442	609.215	677.668	653.929	646.937	34.7581
292	SpecAI_78_84862		EEEKIKQWVLDFYKLWEEFSKLTKEIAEDKVEESGDPEKEREKKMEKYLEKFKKLKPEFEKLMKESEKLKELNHPLYKKLVELSEYMKEVWELFKELFEAFEKLRELKEKGAPKEEIEKVKKKMEEIKKKLKEMAPEVEKKEKELKEVVAKILA	1.19859	90.0161	0.348855	0.3636	740.534	649.18	550.356	646.69	95.1134
201	SpecAI_78_54801		KEEELKQFVVDFHEYFDWLADRTAEIAADVVEDSGDPEKARAEKLEELEKEFEKKKPIFEELKKKAEELKKLNHPLFKKLVELFEYAVEIEKLFEELFEYFKKRKELEATGAPQEEIDKAKAKMDKAKAELKAIAPEVEARKAELDKVVAEILA	0.857915	91.0823	0.358134	0.3312	676.86	617.98	645.043	646.628	29.4721
286	SpecAI_78_58453		KEEEIKQFVKDFEKLFKWAADRTKEIAEDKVEDTGDPEAAREKKYDELLKEREKLKPKFEELKKKAEELKKLNDPLFKKLVKLFEFLKEVWEKFEELFKAYKELKALKATGAPAEEIAKAQAKMEAAKEELKAMAPEVEKKLEELEKVVKEILK	1.10355	92.2529	0.348592	0.3312	648.129	603.345	687.924	646.466	42.3138
126	SpecAI_78_81391		MEEEIKQFVVDFKEYFNWLVDTTKEIAEDKVEDTGDPEAEREKQLDKLLEKMKEREPKWKELKEKAEELKKLNHPLYKELVKLFEYAEEVKEKFEKLFEAFKKLKELKAKGAPQEEIDAVKAEMKKVKEELKAQAPEVEEKKEKLEKVVEKILK	0.92647	90.2843	0.343513	0.3571	570.072	675.545	693.115	646.244	66.5491
301	SpecAI_78_18760		KEEEIKNFVKEFKEFFEELVEETEEIAEDKIEESGDPEKERRKKEEEFLKKLKEKEPKFKELEKKAEELKKLNHPLYKELVKHFEFAKEIWKLFKKYAEYLEKLKKLLEEGAPKEEIEKVREERDKAKKELKERAEEVKKRKEELEKVAKKILE	1.04332	90.8331	0.348567	0.3312	635.224	675.725	622.158	644.369	27.9297
133	SpecAI_78_42716		KEEEELEWVKEFKEFWDWAAERTAEVAADPVAPTGDPEAARDAREEKLAAERKEREPKFKELMKKTEELKKKNHPLYKKLVEHAEFLKEVWAKFDAYFAAAAALKALRAAGAPAAEIAAARAARDAARAELQAMAPEVEARRESVKKVVEEILE	1.18551	90.8025	0.361108	0.3377	645.984	650.232	628.083	641.433	11.7552
53	SpecAI_78_91176		EEEKIKQFVVDFKKFWDKLVALTQEIAADKVEPTGNPEAARDAKLDKLKAEYKELKPVKEKLFEEAEKLKELNDPLYKELVKLSEFAKEVWEKIEKLFAAYEKLKKLKAEGAPAEEIAKALAERDAAHAELKAAAPEVAAKKKELEAVVAKILA	1.22025	90.1421	0.359243	0.3312	575.836	640.991	703.956	640.261	64.0633
87	SpecAI_78_80228		SEKELKEFVKKFKEFFNKLAERTEELAADPVAPTGDPAAARAAREAALREQLAKDKPEKEKLKEKAKELKELNHPLFKKLVELFEFAEEQWEKLDALAAAGAALAALRAAGAPAAELAAARAARDAALAELRASAEEVKEKKEELDKVVEEILK	1.35882	91.3071	0.362199	0.3312	704.936	617.794	595.699	639.476	57.7558
322	SpecAI_8_88363		KEEEEEFEKELEELFKNLEEKSKEIVAATEKFLATQSEEARKAFYKAFEWFSDWLDRLEELLARNPVFESGDPEAEIARIEARFAEALKLLAPAWEGLKKCAEILKKLNTPEDKELVKKFEENEKRWAALQARAAAFAAA	1.04876	90.1783	0.36058	0.3357	602.565	631.617	683.185	639.122	40.8305
183	SpecAI_60_61933		DVKEFAKEFKEFFDWLLETLEELEKFPVEETGDPIEEVFKKLDELLKEKKEKEPKFEELKKKAEELKKLNKPKYKKIVELFEVAEKLWEMFNELFEFYEELKEKLKSGEITKEEAYELFLKKLKELKEENKEVYKEREKILPEALKAIEEIIA	1.66001	90.2202	0.346055	0.3595	619.359	674.845	622.397	638.867	31.1946
340	SpecAI_78_61842		EEEEIQQWVVDFEEFWTWLAARTKELAADKVEDTGDPAAARDAKFDKLAEEFKKKEPEFEKLKKKSEKLKELNHPLYKKLVELSEKMEEVWAKFKELFAAHAKIKELLAAGAPQAEIDAARAARDAALAALKAQAPEVEALEKELKEVVAKILA	0.886412	90.5222	0.359534	0.3312	697.052	647.981	568.279	637.771	64.9907
228	SpecAI_78_96153		EEEKLKKFFVDFEKLWKWLAKKTKEIAEDKVEETGDPEKEREKKRKKLLEEFKKKKPKFEEILKEAEKLKKLNDPLYKEVVELVEFMKEVWEKFEKMFEAFEKLEELKAKGAPKEEIEKELAELKKYEKELKEMAKEVEEREKKLKEVVEKILK	1.16043	90.1802	0.353476	0.3312	625.609	589.086	697.107	637.267	54.9461
46	SpecAI_78_66872		EEEERQQFVKDFKEYWDWLAARTKEIAANKVEPTGDPAAARAAQMEKYLAEMEERKPKREELMKKAEELKKLNHPLYKELVELAEKAKEVWALFEDLFAAYQKVKALLASGAPAAEIAAAVAAMNAKLAELQARAPEVAANEKKLKAVVAKILA	1.1283	90.1801	0.366499	0.3117	584.592	621.517	705.639	637.25	62.0382
156	SpecAI_78_56393		KEEKIKQFVKDFEKYFNWLVEKTKEFAEDKVEESGDPEKEIEKKLEKYEEEFKKRKPEKEKLLKEIEELKKLNHPLYKELVKLAEYAKEVWELFEELFKAREEIKKLKKEGAKKEEIEEAKKKAEEYKEKIKSLKPEVEKKKEELKKVVEKILK	1.48056	90.0673	0.357994	0.3247	595.503	653.135	662.262	636.967	36.1972
323	SpecAI_60_67121		EIKEWAKDLEKYAEKQEKLLEELEKNEVEESGNPEKAIFEKLDKLLEEYKKLKPKFEELKKKGEELKKLNKPEYKVIVEYLELLEKINKMFEKLFEKYEELKKKLESGEISLKEAYEKLKKKLKELKEENKEVYEELKKIKPEAKKAIEKIIK	1.5426	90.5537	0.338276	0.3464	636.597	598.481	673.397	636.158	37.4598
212	SpecAI_60_83575		DIRQFAKDFKEYVDWLRKRLEELEAFPVEETGNPAAAVFARLDKLMAEMKELKPKRKELKEKAEELKKLNHPDYKVIVKMFELCEKLWEMFEKLAKAFAELRAKLAAGEITEEEALARLLAVVEELKKENKEVYKEFEEILPETEKAIKKIIE	1.40014	92.0729	0.340163	0.3791	618.75	628.232	657.549	634.844	20.227
59	SpecAI_78_71953		KQEEIKQFVVDFKEFFDWLAERTAEIAADPVEPTGDPAAARRERWDALLEEQKKREPVFKELMEKSEELKKLKDPLFEKLVEIAEFAKEVWALFEAAFAAYEELRRLEAEGAPAAERAAARARLEAARAKLRALAPEVAAKREELKKVVEEILK	1.85325	91.7427	0.35283	0.3182	612.58	655.322	635.775	634.559	21.3968
180	SpecAI_78_71026		KEEEIKQFVKDFYEYWKWLAEKTKEIAEDKVEDTGDPAAARAKKEAKLLEELKEKKPKFEELMKKAEELKKLNHPLFKKLVELAEFMKEVYELFEKRAAAFAKLAKLLAEGAPAEEIAAAAAEYLAVHKKLQELAPEVKEREEELKKVVEEILK	1.14796	90.4953	0.367856	0.3182	639.566	669.851	588.118	632.512	41.3208
114	SpecAI_78_20752		KEEEIKEFVKEFEEFFNWLVERTAEIAADPVAPTGNPAAERAKREAALLAELAEREPKFKELEEKAEELKKLNDPLYEKLVELWEYAKEVWALFQERAAAFKELAALKAAGAPAAERAKAAAALAAARAKLKALAPEVEKRREELKKVVEEILK	1.03647	91.8753	0.356558	0.2987	650.899	631.137	610.168	630.735	20.3687
150	SpecAI_60_50191		DLKQFAKDFEEFSKWLEETLEELKAFPLEESGDPAAALFAKLDVLLKEAEEKKPKFEELKEKAEELKKLNKPEYKVIVKAFELDVKIWEMFEKLLAHYKELKAKLAAGEITKEEALARLLAKVEELLAENKEVLKEREEIKEETKEAIEKIIK	1.41774	90.2657	0.350677	0.3399	605.966	633.635	652.35	630.651	23.3355
190	SpecAI_78_23497		KELERQQFVVDFQKFFDWLADKTEEIAKDEVEDTGDPEAAIEAKMEKLLEERKKKEPEWKELKEKMKELKKLNHPLYKELVELAEYAEKVWEKFDALFAAFEKIKALKASGAPQEEIDAAKAEMEAKKAELKAEAPEVKAKREKLEEVVAKILA	1.03079	90.858	0.355841	0.3182	605.57	631.567	652.153	629.763	23.3438
355	SpecAI_78_37701		SEEEKLEFVKKFKEYFKELAELTKEFAEDKVEDSGDPEAEREKRMKELLELFKKRKPEFEELMKKAEELKKENHPLYKKLVEISEFAKEIEALFEALAAAFEALQKLKAEGAPAEEIKAAQAERDAKLAELKAKAPEVEEKEKELEEVVKEILE	1.30063	90.3027	0.35558	0.3312	574.948	693.068	620.774	629.596	59.5525
203	SpecAI_78_20090		EEKEKKEWVVKFKEFFDWLAEKTKEIAEDKVEDTGDPEAARDAKFAKLEAEFEKKKEEKEKLFAKSEELKKENDPLYKKLVELSEFAKEVWEKFEKLFAAYAKIKELKAKGAPQAEIDAAKAARDAALKELQDMAPEVEKRREELEKVVAEILA	1.17784	91.4821	0.358768	0.3312	609.929	625.354	652.518	629.267	21.5625
196	SpecAI_78_65543		MEEEEKEFVKEFEEFFNKLVELVKEFAEDEVEDTGDPEAARDEKLKKLLEEFKKFEPKFKELEKKAEELEKKNDEKYKKLVELFKFMKEVKALLKKLRDAFLKEQELKAQGAPQEEIDKARAERDALLAEIKALKPEVEKKKEELKKVVEEILK	1.46884	90.2081	0.358108	0.3377	746.605	590.12	550.122	628.949	103.837
16	SpecAI_60_86396		EVKEWAKELEEFSKKLEERLELLKAFPVEPTGDPAKAIFEKLDELLKEFEEDKPKFEKLKEKTKELKKLNKPEYEVIVKYADLNEKIWEMLEKLAKHYKELKEKLAKGEITLEEAYKEYLAELEKLEKENKEVLEERKKILPEAKEAIKKIIA	1.87915	91.1049	0.347761	0.3529	608.599	650.184	627.336	628.706	20.8262
127	SpecAI_78_27671		KEEEIKEWVKEFEEFFEWLVDKTEEFAEDVVEDTGDPAAARAARDDELLAEYKELKPKFEELKKKSKELKELNHPLFKKLVEISEFAEEVWALFSEYFAALEELRALEAAGAPAAELAAARARRDAALAKIKALAPEVKEKREELKKVVEEILK	1.03898	91.5023	0.360285	0.3442	609.003	619.824	656.578	628.468	24.9379
70	SpecAI_78_53083		EEAKIKQFVKDFEEYFTWLVERTKEIAEDKVEPTGDPEAARAAKEDKLLAELKERKPTFEKLKKEAEKLKELNHPLYKKLVEIAEKAVEIWKLFEEYAAAYEKIKALLASGAPKEEIDKAKAEKEAIHKKLQEIAPEVEALEKEAKKVAAEILA	1.02166	90.3158	0.370887	0.3182	677.121	570.305	636.461	627.962	53.9128
223	SpecAI_60_19746		DLKQWAKDFKEYNDKLLKLLEELKKNEVEESGDPVAAVFEKLDKIEKEFKELKPKFKELEEKTEKVKELNTPELKKIVELSELNKKIWKMFEELLEKYKELKAELAAGKITKEEAGKRLLEKIKELEEKNKETLEELKKILPEAEKAIEKLIK	1.57142	90.2181	0.342541	0.3725	667.916	633.552	581.735	627.735	43.3838
224	SpecAI_78_34117		EEEEIKQFVIDFKEFWNWLVDRTAELAADPVEPTGDPEAARAERLEVLRKEFEERKPKKEELFKKAEKLKELNHPLYKKLVELAEFAKEVWARFEALFAAADELARLEAEGAPAEERAAARARLEARREELRALAPEVEARKSELEEVVEKILK	1.23745	91.0405	0.354153	0.3182	613.089	587.708	681.462	627.42	48.4917
99	SpecAI_78_92566		EEEKIKQFVIDFKKFFDWLADKTKEIAEDKVEPTGDPEKAREKKFEELLKEFKKKEPEFEKLKKEAEELKKLNNELYKELVELAEKAKEVWDKFKKLFEAFEKIKELEAKGGPKEEIEAAKKEMEAARAELKAQAPEVEKLKEKLEEVVKKILE	0.903027	90.4199	0.346283	0.3442	674.602	576.921	629.638	627.054	48.8918
96	SpecAI_78_80405		MEEEKKQWVVEFEKEFNWLVEKTKEIAEDKVEDTGDPEAARRAQLEKLKAEQKERKPLKEKLMEKSEELKKLNHPLYKELVKLAEWFKEQWAKFEALFAAYDEIEALLAAGAPAEEIAAARAAMEAKKAELKASAPEAEAQLEKLKKVVAKILA	1.12005	90.0914	0.358379	0.3442	601.868	596.309	682.655	626.944	48.3274
237	SpecAI_78_46527		EEEEIKQFFVDFEKFFNWVADRTKEIAEDKVEDTGDPEAARREKMKKFLEELEKKKPEFEKLKKKAEELKKLNDPLFKEVVKLFEYLKEVWDLFEELAAAFKELEKLEAEGGPAEEIEAARAKMEAARAKLKAMAPEVEKKREELKKVIEKILK	0.894682	90.3769	0.357502	0.3182	593.578	625.534	658.233	625.782	32.3284
199	SpecAI_78_48305		EEAKLQQWVLDFEKAFDWMADRTKELAEDKVEDTGDPEAARDKKFDELLKELEERKPEFEKLLEESEKLKELNHPLFKKLVELAEFFKEDWELFKALAEAYKELKALLASGAPEEEIKAAKAKMEEALKKIQEKAPEVEARREELRKVVAEILA	0.940331	90.9617	0.358226	0.3247	531.738	675.466	669.692	625.632	81.3658
197	SpecAI_78_63825		EEEEIKEFVIEFEKLFNESVELTKEIAEDKVEETGDPEKARDEKEEKLLKKKEELKPKFEKIKEKSEKLKELNHPLYKKLVELSEYLKEVWELFEEYFKAYKEIKKLLAEGAPKEEIEKALKKRNEIKKKLKELEPEVEKKKEELKKVVEEILA	1.24283	91.0551	0.354012	0.3377	666.097	615.008	593.301	624.802	37.3731
120	SpecAI_78_70846		SEEEILQWVKDFNKFFKWLADRTKEFAADKVEPTGDPAAARAARLDKLLAEFEKRKPLFEKLMEESEKLKELNHPLYEKLVELSEFAKEVWALFSALFAAEQRRRKLLAEGAPQAEIDAAAAEAAAAHAELKALAPEVEAKLKELEEVVEKILA	0.938894	91.0818	0.363657	0.3312	601.991	628.418	643.531	624.646	21.0252
64	SpecAI_60_27649		SIKEFAKEFKEFVEELEELLKELEKFEVKESGDPIAEIFKKLDKVLEKFKKLEPKFKELKKKAEKLKELKEPKFEVIVKQFELAVKIYEMLKELLEFYKELKAKLEAGEITPEEAYELFLKKLKELKEKNKEVFKEFKEIKPEAEKAIEEIIK	1.84591	90.7324	0.342297	0.3595	635.747	668.256	568.585	624.196	50.8297
89	SpecAI_60_61082		EIKEWAKEFKEFDEKLDDLLEKLKKNEVKPSGNPIKEIFEQLEEILKEFEKLKPKFEELKKKAEELKKLNKPEYKVIVKQFELNEKLWEMFKELKEFYKELKKKLEEGEISLEEAGELYKKKVKELEEKNKEVYEERKKIKPEYEKAVEKIIK	1.42433	91.3576	0.334871	0.3333	661.758	575.99	633.658	623.802	43.7253
346	SpecAI_78_99998		KEEELQQFVVDFNEYFEWLVETTEEIAADVVEDTGDPKAAIDAKMDELLKKWEEKKPKFEELKEKAKELKELNHPLFKELVELFEYAEKVKKLFEELFEAYKKLKKLEAEGAPEEEIKAAQEKRDKAKQELKDMAPEVKAKKEKLKAVVEEILK	1.02503	90.6477	0.352908	0.3571	683.397	569.254	616.79	623.147	57.3366
73	SpecAI_78_94634		SEAEILQFVKDFNEFFEWLAETTKEIAEDKVEETGDPAAARAEKLKVLLEKFKEKEPKFKELKKKAEELKKLNHPLYKELVKLFDFAEEVWALFKELFAHFEKLEKLLAEGAPAEEIAKALAAMEAARAKLKALAPEVEKRLEELKKVVEKILA	0.956864	91.8033	0.357975	0.3247	603.596	542.968	722.83	623.131	91.5088
348	SpecAI_78_25467		EEEEIKQWVIDFEEYWNWAAEKTKEIAEDKVEETGDPEAARAAKEKKLLEEFKKKEPKFKELKAKSEKLKELDHPLFKKLVELSEFLEEVWKLFKEYFAAFKELEKLKAEGAAPEEIKAALAKRDAAKKKLQDMAPEVEKRKEELEKVVKEILE	1.24524	90.6245	0.359081	0.3247	626.21	615.017	626.461	622.563	6.53606
164	SpecAI_78_3639		EEKEIQEWVLEFNEFFQWLVDLTGEIAADKVEPTGDPAAARAAKMKKWLEEFKKKEPLFKKLMEKTEKLKELNHPLYKKLVELAEFAKEVWKKFEALFAAFKKIEELKKKGAPAEEIKKAEAERDAKVAELKAMAPEVAAKKEELDKVVAEILA	1.35724	91.2861	0.357395	0.3312	685.779	534.859	646.085	622.241	78.2347
68	SpecAI_78_23268		SEEELLNFVKEFKEEFDWAVERTKEFAKNEVKETGDPEKAIDEKMEKYLKEYEERKPKFKELLEKAEKLKELNHPLFKELVKHVEFLKKIWELFEKLFEAYKKIKELKAKGAPAEEIAKAKAKRNAALKEIQDLAPEVEKRKEEVDKVVKKILE	1.14537	91.5434	0.359264	0.3312	651.182	573.345	640.043	621.523	42.0939
221	SpecAI_78_17773		EEEEIRQFVVDFQEFWNWVVDLTDEFAKDVVEPTGNPEAARDKKLEKLAALFKERAPKFKELQEKLKKLKELGDPLYAELVKHGEKLKEWWAKIEALFAAFAEIQKLKAEGGPAAEIAAAKAKRDAALAEIKAAAPEVKAERASVEAVVAEILA	1.09897	90.3348	0.366066	0.3247	617.404	618.631	626.819	620.951	5.11881
222	SpecAI_78_16761		EEEEIQQFVVDFEELWTWAAERTAELAENRVEPSGDPEAELDRRFAELAKEAEELEPKRKELFEKAEKLKELNHPLYEKLVELSEFLKEVWALFKALFAAFAKLQELRAAGAPAAERAAARAARDAALAELQARAPEVAARAEELRAVVAEILA	1.1649	91.6679	0.362193	0.3442	616.013	653.481	593.012	620.835	30.5215
15	SpecAI_60_13859		ELKEFAKRFKEFLDWLLERLEELEKFKIEESGDEIKAIFEQLEKLLEEYEKLKPEFKKLMEEAEKLKELNHPKYKVIVKAAELAKKIWEMFEKLFEKYKKLKKLLEEGKISLEEAHEELLKELKKLKEENKEVYKELEEILPETKKAIEEIIA	1.80303	92.1163	0.333512	0.366	645.071	596.66	620.739	620.823	24.2054
257	SpecAI_78_71916		ESEEIKEFVKEFKEFFDWLVARTAEIAADVVEPTGDPAAARAAKEDALEEERKKLEPKKKELFEKAEKLKELNHPLYKELVELAEFAKEVWALFDAYFAARAALKALKAAGAPAAERAAAAAARDAARAALRARAPEVEERKAKLKEVVEKILK	1.38301	90.4218	0.359997	0.3247	613.959	575.998	672.456	620.805	48.5918
276	SpecAI_60_33963		DVKEWAKEFKEFSDWLDELEEFLEKFPVKPSGDPVKEIFEILDEILKELEKRKPKFEELKKKGKELKELNHPDYAVLVEQLELDEKIWEMFEKLAKEYKELKEKLEAGEISLEEAYERLLEKIKELKEENKEVFKEREKIKPKAEEAIKKIIA	1.81234	90.95	0.339863	0.3856	666.553	598.266	597.007	620.609	39.794
60	SpecAI_60_17720		EVKQWAKDFKEFDEWLDKRLEKLKKFEVKESGDPVEEIFEQLDELLKEYEEKKPKKKELVEKGKKLKELNEPEYKVIVERLELNEKIWESFEKLFEHVKELKKKLAAGEISKEEAYKLYLEKLKELEEENKEVLKEREKIKPKADEAIKKIIA	1.0216	91.7633	0.350434	0.3399	612.608	693.457	554.523	620.196	69.777
178	SpecAI_78_65828		EEEKIKQFVVDFKEYFDWLVDRTAELAADPLADTGDPEAARRAQLEVLLKELEKRKPEREKLLKEAEELKKLNHPLFKKLVEHAEYAKEVWELFEKLAEAFKREQKLLAEGAPQEEIDKARAELEAALAELQAQAPEVAAKREEVDKVVEEILA	1.19058	91.3241	0.359575	0.3442	591.372	597.648	671.477	620.165	44.5474
265	SpecAI_78_36793		KEEEIKQFVVDFKEFFEWLAEKTKEFAADKVEDTGDPEAARDAQFKKLMEEMKEKEPKFKELKKKSEELKKLNHPLYKKLVELSEYAKEVWEDFKELFKAFAELEKLRAEGAPQAEIDAAQAKRDAALAKIKAQAPEVEKKEEELKKVVEKILK	1.12083	91.7816	0.354177	0.3442	638.385	617.608	604.456	620.149	17.1066
21	SpecAI_78_97048		EEEEKKQFVVDFKEYFDWLAKLTKEIAEDKVVDTGDPEAARAAKLEEYLKEFEKRKPKFEELAKKAEELKKLNHPLYKELVKLFEFAKKINELFEKLFEAFKKLKALEAEGAPAAEKAKAKAKMDAYKAELKAIAPEVEEKEKELKKVVEQILA	0.799404	90.7148	0.359071	0.3247	597.641	619.09	643.003	619.912	22.6917
19	SpecAI_78_78120		SEEELKQWVVDFEKYWNWLVETTEKIAADPVEPTGDPEAARAKQLDELEKEREKKKPEFKKLMEKTEKVEKLNHPLFKKLVELAKFAKEVWEKFEKLFAAYAALKKLEAEGAAKEERDKAKAKMDAATAELKAMAPEVAAKDKELKEVVAQILA	1.15009	92.1318	0.360236	0.3247	668.97	617.862	571.85	619.561	48.5823
57	SpecAI_8_31966		MEEYEKFEKELEELFKDIKETTAAIVAATAAFLANRTPADREAFVENFEKFSKFLEKLEELEKKNPVLPSGDEEKAKEEIKKRFLEAYELLKPAFEGLKACAKILAEEGKPEDAELVEKFKEDEKRWKEFEKKMEEFKKK	1.56787	90.2785	0.350696	0.3429	564.427	747.156	546.688	619.423	110.975
130	SpecAI_60_75434		EVKEWAAEFKKYSDWLKETLKELEKFEVKPSGDEIEEIFKKLDELLEKFKKLEPEAKKLFEKSEELKKLGKPEYEVIVKQAELDKKLYDMFKKLFEEYEKLKKELESGKISKEEAYERFLKKLKELKEENKEVFKEREKIEPEAEKAIAKIIA	1.92845	92.8955	0.334218	0.3595	616.511	647.199	594.202	619.304	26.6088
101	SpecAI_78_53007		EEEEIKQFVIDFEKFWKWLADTTEELAANPVAPTGDPEAARAARFAALRAEAEKRKPVFEELMKKAEKLKELNHPLYKKLVELAEFAKEVWEKLKALLEAEAALEALKAAGAPQAEIDAAKAKRDAALAELQAMAPEVKKKREELEKVVKEILE	1.13172	90.4503	0.364859	0.3312	701.81	582.096	573.718	619.208	71.6581
243	SpecAI_78_27534		SEKERLEFVKEFYELFKWAAETTAEFAADPVADSGDPEAERAKRMDELLEKMKKLEPEFKKIMEKAKELKKLNHPLYKKLVEYAEYLKKVWEKFEKLFEAYEKLQKLKAEGAPEEEIKKAKAEMEAALAEIKAEAPEVAALLEEVEKVVEEILK	1.25368	91.6946	0.352241	0.3377	627.417	592.852	635.817	618.695	22.7712
18	SpecAI_78_70566		KEEELQQWVVDFEEFWNWLAERTKELAADPVEPTGDPEAARRAREAELLAEAEKRAPLFAELKAKTEEVKELNNPLFKELVELAEFAEEVWALFAALAAALRAERALLAAGAAPAEIEAARAARDAALQALRDLAPEVEARREKLKKVVEEILK	1.11206	91.259	0.366653	0.3117	633.205	602.271	620.242	618.573	15.5345
65	SpecAI_78_48795		EEEKIKEFVKKFEKFFNWLVERTQEFAEDKVEETGDPEAAIAAQMDKYLEEMKKREPEKKKLFEEAEKLKKLNHPLYKKLVELVEFAKEVWKDFEALFAAYQKLKALKAAGAPQAEIDKAKAEMDAALQKIKDKAPEVKEKEKELKKVVEEILK	1.26086	90.6368	0.353813	0.3247	641.089	625.819	588.357	618.422	27.1331
6	SpecAI_60_48018		SLKEFAKRLQEFGDEVLELLEELEKDEVVESGNPVLARFERLDKLLERLEKLKPEFEKLKKEAEELEKLKHPKYKVIVEYSKLLEKLWEMLEELAAHFRALREKLAAGEISLEQAGAELAAKLEELKEKNKEVYEELKKILPEAKKAIEEIIK	1.03728	90.4903	0.345786	0.3333	596.936	575.245	682.887	618.356	56.9285
249	SpecAI_78_18372		KEEELKQFVKDFKELFEKAAARTAAFAANPVVPSGDPEAAREAQLDVLLAEQKELKPKKEELKKKLEELKELDHPLYKKLVELGEFLEEVWALEEALFAAFEALKALRAAGAPQAEIDAARAARDAALAELQARAPEVEAKKEELEKVVEEILK	1.2154	91.7068	0.364693	0.3247	633.127	621.501	600.014	618.214	16.7997
269	SpecAI_78_16081		SEAEIQQWFVDFQEFFDWLVAKTEEIAADKVEDTGDPAAARAKKMEEYLKEFEEKKPKKKELLEKGKKLKELNHPLYAKVVELLEFAKEVWEKFEKLFAAFEKIKKLKAEGAPAEEIAKAVAEMNAAIAELKAMAPEVAARRAELDAVVAAILA	0.996167	91.5769	0.365872	0.3247	632.077	599.98	622.268	618.108	16.4474
326	SpecAI_78_2861		KEEEKKKFVEEFKEYFDWVAATTEELAADPVEPTGDPEAARAAREAELLAALAEREPKFKELLAKAEELKKENHPLYKKLVELSEYLAEQWARLRELAAAGRRLAALRAAGAPAAELAAAAAARAAALAALQAAAPEVAARREELEKVVAEILK	1.47916	91.5289	0.351018	0.3312	673.985	604.791	572.64	617.139	51.7883
124	SpecAI_78_41716		KEEEIKQFVKEFKEFFEKLAARTKEIAADPVAPTGDPEAERAARMDALLAEKKELEPKRKELKEKAEELKKLNHPLFKKLVELSEFAEEIWKLFDELFAAYEELKALKAAGAPKAEIEKAKAKMEAARAELRARAPEVEAREKELEKVVEEILK	1.18817	90.9953	0.362265	0.3247	626.522	616.69	606.312	616.508	10.1065
333	SpecAI_78_84002		SEEKEKQFVVDFEEYFNWLVARTAELAADPVEPTGDPEAAIEAKEEKLLAELKEREPKFKELMEQAEKLKEKNHPLYKELVELAEFAREVWALFKELAAAFKEEKKLKAEGAPAAEIKAAKAKREAALAKLKAMAPEVAARKEKLKEVVAKILA	1.42482	92.0046	0.354325	0.3442	592.856	607.137	648.643	616.212	28.9799
152	SpecAI_78_78233		EEEKKKKFVIEFEEFFNWLAARTKEYAEDVVEPTGDPAAARAAREAALLEELKELKPKKEELMKKAEELKKENDPLYKKLVELAEFAKEVWALFERLAAAAEALAALQAAGAPAAAIAAAAAARDAALAEIQAQAPEVEAKEKELKEVVEEILK	1.12724	90.9207	0.363939	0.3117	564.423	654.561	629.54	616.175	46.5316
85	SpecAI_78_54813		EEEKKKKFVKDFEKFFDWLVERTKEIAEDKVEPTGDPEKEREKKFEKLLEEFKKKKPKFEELKKKAEELKKLNDELYKKLVKLFEFAVEVWKLFEELFKYFEEIQKLKKEGAPQEEIDAALAKRDAAEKKLKELAPEVEEKRKELKKVVEEILK	0.959723	90.7689	0.347991	0.3312	587.396	605.176	654.228	615.6	34.6137
267	SpecAI_78_65274		DEEEIKQFVKDFEEFFNWLADRTAEVAADPVAPTGDPEAARAARLAEWRAEAAKLKPKFEKLKEKAEKLKELNHPLYKELVKLSEYAEEVWAKFEALLAAEAALEAAKAAGAPAAEIAALEAAAAAARAELKAMAPEVEEKRKELEEVVKKILS	1.35016	90.4125	0.371004	0.3117	660.612	568.615	616.828	615.351	46.0164
354	SpecAI_78_48092		KEEEIQQWVVEFEEFWNWLAKKTKEIAEDKVEDTGDPEAERAKKEEEYLKEFEKLKPKKEELFKKSEELKELNHPLYKKLVELSEFAKEIWELFEKYFEAFKKIKKLLAEGAPAEEIAAAAAEKEAAKKELKDKAPEVEEKEKELKKVVEEIKK	1.05076	90.537	0.361086	0.3247	662.139	602.834	580.884	615.286	42.0344
230	SpecAI_78_56155		SEKEIKEWVKEFKEFFDWLAERTKEMAEDKVEDTGDPEKAREKQMEEKLKEFEEKKPKFEELKKKMEELKKLNHPLYKELVKLSEYAKEVWEKFEKLFKAYKEIKKLEAEGGPKEEIDKAKAERDAALAEIKAEAPEVEKKREELEKVVAEILK	0.860073	92.3199	0.341675	0.3506	627.43	598.377	619.077	614.961	14.9575
142	SpecAI_78_25613		EEEKIKQFVKDFKEYWDWLVERTAEYAANEVEPTGDPAAARAKKEEEFLKELEELKPKRKELKEQAEKLKKLNHPLYEKLVELSEEAEEVWALFEKLAAHFKALQALLAAGAPAEAIAAELAARDAALAELQARAPRVAELSEEVKKVVEEILK	1.18592	91.1529	0.378344	0.3117	596.071	618.787	626.471	613.776	15.807
191	SpecAI_78_3328		KEEEIKQFVLDFRDYFDWVVDRTAEEAADPVAPTGDPAAARAAREDKLLEEWKERKPLREKLFKKAEELKKLNHPLYKELVKHAEFLKEVVALFDERFAAFEALKALKAAGAPAEERAAAAAKLAAAHAKIKALAPEVAARRASVDAVVARILA	0.869483	91.4784	0.372254	0.3182	604.662	647.048	588.719	613.476	30.147
206	SpecAI_78_29665		SEAKIKKFVVDFEKYFKWLAETTKEIAEDKVEPTGDPEAARRARFKKLLEEREKKKPLFEELKKEAEELKKLNHPLYKKLVEIFEYAKEVEELFDKLFEAYKRREALLAAGAPAEEIAAAKAEMEAVKKKLKEMAPKVKELEKELKEVVEEILA	1.08023	92.2614	0.34911	0.3247	639.236	587.009	612.083	612.776	26.1204
170	SpecAI_78_63345		KEEEKKEWVKEFEKFFNWLAEKTKEIAEDKVEPTGDPEAARAAKFDKYLKEYEKRKPEKEKLFKKSEELKKENNELYKKLVEISEFAKEIWKLFEELFAAYKALQALKASGAPQEEIDAAKKKMEEAKEKLKSLAPEVEKKKEEAKKVVEEILK	0.891754	91.5534	0.349235	0.3377	640.494	536.404	658.442	611.78	65.8916
229	SpecAI_78_19346		EEEELKQFVVDFKEFFDWAADYTKYIAEDPVEDTGDPEAAREKKEEKLLEEFKEKEPKFKELLEKAEELKKLNDPLFKELVKHVEFLKEVWEKFKEYFAAFEELKKLKAEGAPEEEIKAAKAKREAAKKELQEQAPLVEERRKEVEKVVEEILK	1.82628	90.452	0.345711	0.3442	613.519	626.995	593.199	611.238	17.0131
98	SpecAI_78_92566		EEEKIKQFVIDFKKFFDWLADKTKEIAEDKVEPTGDPEKAREKKFEELLKEFKKKEPEFEKLKKEAEELKKLNNELYKELVELAEKAKEVWDKFKKLFEAFEKIKELEAKGGPKEEIEAAKKEMEAARAELKAQAPEVEKLKEKLEEVVKKILE	0.903027	90.4199	0.346283	0.3442	627.392	648.746	557.42	611.186	47.7715
356	SpecAI_78_25677		MEEEIKEFVKEFEELFKWLAEKTKEFAENKVEDTGDPEAAIDAKMAKLLAEKEKLEPKFKKIMEKLEELEKLNHPLYKKLVEIGKFMKEVWAKFEKLFAAFKELQALKAAGAPAEAIAAAQAARDAALAEIQAMAPEVEAKEKELKEVVEKILK	1.20349	90.9466	0.355427	0.3377	614.944	618.787	598.883	610.871	10.5582
36	SpecAI_78_55085		EEEKIKQFVVDFKEYWDWLAEHTKEYAENKVEDTGDPEAAIAKKMEKDLEEFKKLEPKKEELKKEAEKLKELNHPLYKKLVELAEYAEKVWEKFKKLFEAFEKLKKLKAEGAPQEEIDAAKAKRNAALKEIQDMAPEVEKKREEAEKVAEEILK	1.43777	90.9782	0.351619	0.3377	625.294	554.274	652.687	610.752	50.7926
5	SpecAI_78_9209		KEEEIKEFFKEFKEYFDWLADQTAALAAAPVAPTGDPEAEIDARFDALAAAWAERKPKWKELEEKAEELKKLNHPLYKKLVELAEFAREVRAEFEALFAAHAALKALRAAGAPQAEIDAARAAREAALAALQARAPEVAARREELKKVVEEILK	1.3081	91.5158	0.367978	0.3117	658.19	597.203	575.602	610.332	42.8308
4	SpecAI_78_46158		EEEEIKQWVVDFKEFFDWLADRTAAVAADKVAPTGDPAAARAAQEEELLKELKEREPKWKELEEKTEKLKELNDPLFEKLVKLAEFAKEVKALFEKRAAAFEKLKELLAKGAPKEEIDKVLAEKEAAVAELKALAPEVAAKREELEKVVAEILK	1.03667	90.4523	0.371957	0.3182	571.483	678.027	579.742	609.751	59.2731
140	SpecAI_78_75415		EEEEKKQFVVDFKEYFDWLAKTTEEIAKDEVEDTGDPAAARAKKMEKLLAEREKKKPKFEELMKKMEKLKEENDPLYEKLVEYAEFAKEVWEKFNELFEAYKKLKKLLAEGAPAEEIAKAAAEMAAAKQKLKDMAPEVKKKREELEKVVKEILE	1.31979	90.0268	0.353603	0.3312	640.823	549.384	638.429	609.545	52.1153
94	SpecAI_8_50965		SEKEKEFEKKLEELLEDIEKTSKEIVAITERYLKTQSPEDREAFLKALDKIEDFVERYEELKEEDVVFDSGDPEKRKKEIREKFLKAFELLKPAMEGIMKCTEILEKENEPEYKEVVERAKKLKERWKKFEEEAKKFKEE	1.5904	90.2703	0.355771	0.3357	625.417	597.96	601.063	608.147	15.0366
63	SpecAI_60_50240		DIKQWAADFKKFYDWLLKRLEELKAFPVKPSGDPVKEIFRLLDEFVKEAKEREPLFEELMKKSEELKKLNHPDYAVIVKLSELLKKLWAAFKELLAHYEELKKKLESGEITLEEAYKRFLEKVKEIEAKNKEVYEELKKILPEADAAIAAILA	1.95078	93.155	0.340932	0.3529	564.305	592.373	667.562	608.08	53.3905
182	SpecAI_78_81562		SEEELKEWVVEFEEFWEWLVERTEELAADVVEPTGDPEAARAKRFAKLREEAKERKPKKEELLKKSEELKKLNDPLYKKLVELSEKAREVWALHERLLEAEAKLEALRAAGAPAEEIAAARAKREAALAELRARAPEVRAAREELKKVVEEILK	1.45383	91.4484	0.355817	0.3442	632.619	569.028	621.207	607.618	33.9036
345	SpecAI_60_75596		EIKQWAKDFKEFSDKLEKREELLKKNPVEPSGDEIEEIFKKLDELEKEKEKEKPKFEELEKKSEELKKLNHPDYKVIVEQSELDKKIWKMFEELFKKYKELKEKLEKGEISKEEAYKLYKEELEKLEKENKEVFEERKKIKEKAEEAIEKIIK	1.9821	90.4169	0.33478	0.3595	657.911	593.903	570.97	607.595	45.0586
25	SpecAI_78_69944		KEEEIKQFVVEFEKLWRWAVARTAEIAADPVAPTGDPEAARAERLAAFLAELEKRKPEFEKLKKKAEELKKLNHPLYKKLVELSEYLEEVWADFEALAAAFRELQALKAAGAPAAELAAARAAADAARARLKARAPEVAAREKELKEVVAKILA	1.10326	90.0103	0.370753	0.3182	592.469	594.756	634.318	607.181	23.5288
218	SpecAI_78_17437		EEEEIKEWVKEFYEFWKWAADRTAEIAADRVEPTGDPAAARAARLDALAAELAERKPVFEELMKKTEKLKKLNHPLYKELVKHAEFLKEVWARFEALAAAHAALRALRAAGAPAAELAAAAAARDAAEAELRAQAPEVKAREKELKKVVEEILK	1.08423	92.6892	0.358506	0.3117	543.451	659.643	617.424	606.839	58.8146
335	SpecAI_8_12608		MEEYKKFKEELEELFKDIEEKSKEIVEITEEYLKTKSEEAREKFIEAFEKISELIEKLEKLLKKNPVFPSGNEEEEKKKIMEKFIKMFELLKPAMEGIFKCAEILKELNKPEYKKIVEEIEKLKKKWEEFEKLIEEFKKK	1.56208	91.7474	0.360301	0.3143	606.02	617.927	594.868	606.271	11.5316
136	SpecAI_78_74713		EEEEIKQWVKDFKEFFNWLADKTKEIAADKVEDTGDPAAARAAKLDEWLKEMEEKKPKFEELKKKAEKLKELNHPLYKELVKLFEFMKEVWAKFEALFEAYKKLQALKAEGAPAAELAAAQAEMDAKKAELKAMAPEVEAKRKELEEVVEKILK	1.02828	91.9386	0.354488	0.3247	618.944	571.838	626.557	605.78	29.6396
327	SpecAI_78_20481		EEEEIKEFVKKFKEFFDWLAERTAEFAADPVAPTGDPEAARAAREDKLLAELKERKPIFEELKKKAEKLKELDHPLYKKLVELFEFAVKVWEKIEKLAAAYEKLRELKAAGAPQAEIDAAAAERDAALAELKASAPEVKAKEEELKKVVEEILK	1.13421	92.2757	0.355477	0.3247	551.465	652.584	612.831	605.627	50.9429
285	SpecAI_78_83747		EEEEKKQFVVEFKEFFDWLVATTAEIAADPVEDTGDPEAAREEKFDKLLAELKERKPKFAELAKKAEELKKLNDPLYKKLVELFEFAKEVWAKLEKLAAAYEKIKALRAEGGPKAEIEAAEAARDAALAELKAMAPEVAAKKEELDKVVAEILA	1.08237	91.4516	0.366514	0.3247	604.205	602.729	609.112	605.349	3.34153
263	SpecAI_78_84058		EEEELKQWVVDFADFFEELAALTEEIAADKVEDTGDPKAAVDAKMDELAKWAEERKPVKEELLEKTKKLKELDHPLYKKLVELAEFAAEVWEKFEALLKAHAELKKLEAEGAPAAERAAAEAKRNAALAELKAMAPEVKARREELKKVVEEILK	1.34153	91.8844	0.354652	0.3377	582.74	607.729	624.294	604.921	20.9192
168	SpecAI_78_54383		MEEEIKKFVKEFNEFFEWLVERTEEIAADPVAPTGDPAAARAAREAELLAELKEKEPKKKELFEKSEELKKLNSPLYKKLVELSEYAKEVWAQFEALAAALERLRALKAAGAPAAERAAARAARDAALAELKARAPEVKAKKEELKKVVEEILK	1.0892	91.928	0.358542	0.3182	608.649	625.549	580.505	604.901	22.7547
320	SpecAI_78_36363		KEKEIQEFVKEFEELFNWAAEKTAEIAANPVAPTGDPAAARAARDAALLAELKEKEPKFKKIMEKAEELKKLNHPLFKKLVKHAEYLKEVWAQFKDLAAAAKALAELEAAGAPAAERAAAAAARNAALAKLQAMAPEVEKKKEEVKKVVEEILK	1.39363	90.6949	0.363495	0.3312	669.5	575.353	568.61	604.487	56.4031
240	SpecAI_60_75777		EEKEFAKEFKEYSDWLEKLLEELKAFPLEPSGDPAAALFAKLDEILAELKEKKPKFEELKKKAEELKKKNKPEYKVIVEQAELDEKIWEMFEKLAAKYEELKAKLAAGEITKEEAFAELLKHIKELEEENKEVLKKRKEIKEEAEKAIEKIIK	1.53514	90.4357	0.345911	0.3203	550.944	630.317	632.141	604.467	46.3616
51	SpecAI_78_86755		KEEEIKEFVKEFKEFFDWLVEKTKEFAENKVEPSGDPVAERFKRLEKLAEEAKEREPKFKELMEKAEELKKLNHPLYKELVELAEFAKEVWKLFEDLLAAYAKLKALLAEGGPAEEIAAAAAALDAKLAEIQAMAPEVEERKKKLEEVVEKILK	1.12956	91.0088	0.35204	0.3312	595.41	601.509	615.976	604.299	10.5628
270	SpecAI_78_61188		SEEKIKQFVVEFEKYWKWLADRTKEIAADVVEDTGDPEAARDAKEDKLLEELKKRKPLFEKLKKEAEELKKLNHPLFKELVKLFEFAVEIEELFKKYAEAYEKIKKLKAEGAPQEEIDAAEKEREKYKAELKARAPEVEAREKELKEVVKKILE	0.935538	93.6981	0.35797	0.3442	566.168	612.06	632.299	603.509	33.8847
295	SpecAI_78_29809		SEKELQEWVKKFEEFFNKLAALTEEIAADVVEPTGNPAAARAARLAALEAEFAKLKPEREELFKKAEELKELNHPLYKKLVELAEFAKEVWALFEKLFAANAEIKALEASGADKAAIDAARAAAAAARAELKARAPEVKAKREELKKVVKEILE	1.18945	90.2121	0.364907	0.3182	623.451	634.198	552.171	603.273	44.5811
149	SpecAI_78_32980		KEEEIKEWVKEFKELWDWAAERTKEIAEDKVEPTGDPAAARAAKLEKFLAELKEREPLFEKLLKKSEELKKLNHPLFKKLVELSEFLAKVWAKFKALADAVKAIKALEAAGAPAAEIAAAKAKAAAAKAELQAQAPEVEAKREEVEEVVEEILK	1.1952	90.2849	0.366656	0.2987	580.925	565.285	661.966	602.726	51.8968
227	SpecAI_8_20533		SSKYKKFEEKLEELLKDIEEKSKEIVEITKAFLENKSEEDIKKFIEAFEYINEWVEKYEELLKENPVFPSGDPEKEKKKIEEKFIKAYELLKPAFEGIKECTKILKKLKKPEYEEIVKRAEELEKKWKKIEEKIKKFKES	1.60723	91.2434	0.345819	0.3643	615.467	557.094	630.441	601.001	38.7543
214	SpecAI_60_72012		KIKEFAKEHEEFTEKLLELLELLEENPVEESGNPVAARFKKLDELLKLFEELKPKKEKILKEAEKLKELNDPKYKVIVEQIELDKKIWEAFEELAKHFKELKAKLAAGEISEEEAGRLLEEKLKEIKEKNKEVLEKRKEILPEYKKAVEEIIK	1.42716	90.5703	0.345533	0.3529	636.333	589.197	573.595	599.708	32.6631
231	SpecAI_78_24475		KEEEIKQFVKDFKKYFDWLAEETKEIAEDKVEPTGNPEKAREEQEEKKLEEMKKRKPEFEKLKEKAKELKKLNHPLYKELVKISEFMEEVWELFEERFKYFEEIKKLKAEGAPKEEIDKAEAAYKAAVEKLKAMAPEVEKKREELDKVVEKILK	1.05958	92.3581	0.350148	0.3247	704.647	563.716	529.713	599.358	92.7538
143	SpecAI_93_85762		SELEKILKELEEFLEKIEERAKEIVENTKNFLETRSPEAIEKFKEDFEWFERLLELVEKLLEYNLVEETGDPEKAVAEQMEILLKVLELLKPAKEGLAECAKILAELNKPEYKKLVERFKEAEKRWKKFEELAAKFKEK	1.87583	90.2793	0.348973	0.3381	591.322	545.939	658.905	598.722	56.8456
210	SpecAI_60_11664		KVKEFAKEFQEFHDWLEEKEKELEEFKVEESGNPVAEIFKRLDELLKKFEEKKPKFEELKKKAEELEKLNKPEYKVIVELSKLDKKIWEAFEELFAHYKELKAKLAAGEITEEEAYKLYLEKLKEIKEKNKEVYEERKKILPEAKKAIEKIIK	1.83303	90.568	0.342386	0.3529	585.678	623.718	585.685	598.36	21.9608
137	SpecAI_78_87836		EEEKLKQFVVDFQKYFDWVADLTAEIAADKVEDTGDPEKARAEKMEKYLAEAKEREPVFKELVAEAEKLKELNDPLFKELVKISEYLKEVEAKFKALFAAFEELQKLKAEGAPKAEQDAALAKMEAKKAELKAMAPEVEAKRAEAEKVVAKILA	1.08593	90.9336	0.360921	0.3442	571.437	565.384	658.158	598.327	51.9043
11	SpecAI_78_99120		EEEEKKQFVIDFKEFFNWLADRTKEIAEDKVEPTGDPEAALAAKEEKLAAEAEKREPIWKELAEKAEELKKLNHPLYKKLVELFEFAKEIWALHKAYLAAAAELKALKAAGAPAAEQAAAAAARDAAKAELKARAPEVEERLKELEEVVEKILK	0.942076	91.2832	0.363199	0.3247	576.108	619.258	598.362	597.909	21.5786
0	SpecAI_60_30380		EVKQWAKDLQEFADKLDARLAELEANPVVPTGNPAKALFERLDKLLAERKEDEPKKKELFEKTEELKKLKDPEFEVIVKYADLLKKIWEMEEKLFKHYEELKAKLAAGEITLEEAEALLKKKLEELKKENKDVLKEREKIKPEALEAIKKIIA	1.14512	91.4786	0.353483	0.3595	658.582	545.018	589.758	597.786	57.206
246	SpecAI_78_71532		EEKEIQQFVIDFEKLWNWLVDTTAELAADKVEPTGDPEAARDAKMDALAAALAEKKPKFEELKKKAEKLKELNHPLYKELVELSEKAEEYWALLTALAAAHARLKALRAAGAPAAELAAAKAERDAALAELQARAPEVEADRAKLKEVVAKILA	1.23351	90.4835	0.366676	0.3247	624.128	606.826	562.139	597.698	31.987
325	SpecAI_78_85172		EEEKIKEFVKKFEEFWKWLVERTAELAADVVEPTGDPEAARAERAAALAEELAKRAPERKELEEEAEKLKELNHPLYKKLVELWEFAKEVWADFEALAAAGAALAALRAAGAPAAELAAAQAARDAALAALQARAPEVAAREKELKKVVEEILK	1.43217	90.5196	0.36149	0.3182	635.833	570.73	584.992	597.185	34.2215
31	SpecAI_60_70673		SIKEHAKKLKEYDDWLEEKLEELKKFEVKPSGNPVAEIFKKLEKLLEELKKKEPLFKELMEKTKELKKLKKPEYEVIVKRAELLEKIYEMLKELAKHFEELKKKLESGEITEEEAYKLFLKKLKELEEENKEVYKEREKIREEYEKAVEKIIA	1.78075	90.7756	0.345524	0.3464	561.495	609.927	616.356	595.926	29.991
38	SpecAI_60_14096		SLKEWAKELKEYHDELLELLKELKEFPVEPSGNEEEEIFKKLDKLLEKKEKLKPKFEELKEKSKKLKELKDPKLEVIVKYSELCEKLWEMFEKLFEHYKELKEKLEKGEITLEEAYKLFLEKLEKLLKENEEVLKELEEIKPEAEKAIKEIIA	1.85918	90.2758	0.345253	0.3399	522.439	674.822	589.436	595.565	76.3762
47	SpecAI_78_30506		EEEKIKQFVKDFYEYWKWLVDLTAEIAADKVEPTGDPAAARAAKLAKLEEKFKEKEPKFKKLEEEAEKLKKLNHPLYKKLVELFEFAKEVWAKFKALFDARAAIRALKAAGAPAAEIAAAKAKAAAARAELKAMAPEVKEREKELKEVVEEILK	1.35321	90.5355	0.363028	0.3247	588.48	590.308	604.926	594.571	9.01373
165	SpecAI_78_31334		EEEELKQWVVDFNEYWKWLAARTAELAADVVEDTGDPEAARAEKFAKLAEEAKAREPKFKELKEKAEKVKELNHPLYKKLVELFEFAVEVEAQLKALLAARAALEKLLAEGGPQAEIDAARAAADAALAALKARAPEVAAREKELKEVVEKILK	1.0663	90.7404	0.371135	0.3052	583.517	603.465	596.652	594.544	10.1397
107	SpecAI_78_38927		KEEEIKEFVKEFEKYFNWLVKRTKEIAADVVEDTGDPEAARAAKEEKLLAEAKEKEPERKKLFEKMEELKKLNHPLYKKLVELSEYAKELWALFQERFAAFEELKKLLAEGGPEAEIAKAKAALEAAKAKLKALAPEAEKREKELKEVVEKILA	0.92865	90.2347	0.366621	0.3247	637.271	554.423	589.67	593.788	41.5769
220	SpecAI_78_89322		EEEKIKNWVKEFEKFFNWAVDTTKEIAENKVEDTGDPEAAKAKKLAELKKEFEKKKPEFEKLMEESEKLKELNHPLYKELVELSEFLKEVWEKFKEMFAAFAKIEELKAKGAPKEEIDAAKAKLKAAEEKLKAMAPEVEKKREKLKEVVEKILK	1.01402	90.4292	0.351163	0.3442	559.148	579.511	641.082	593.247	42.6593
213	SpecAI_78_40052		KEEELQNFVKEFEKFFNWLAARTEAFAANEVAPTGDPAAARAERMAALLAEFEKRKPEREKLFKKAEELKKLNHPLYKKLVELSEYAKEVWAKFEALFAAFRELQALLAAGAPQAEIDAALARLAAALAEIQAMAPEVAKKKEELEKVVKEILE	1.17095	90.2183	0.372483	0.3117	609.658	591.036	578.127	592.94	15.8518
52	SpecAI_78_8941		EEAKIKQFVKDFEEYFNWLVDTTEEFAADVVEDTGDPEAARAKRMAALLKEFEERKPLWEKLEKEAEKLKKLNHPLYKKLVELFEFAKELKAKFEELFAAFKKLEALKAAGAAPEELAKAKAEADAKLAEIKALAPEAAAKREELEKVVKEILK	1.21484	90.4903	0.354583	0.3052	575.68	586.611	616.326	592.872	21.0344
104	SpecAI_78_20205		SEEEIKNFVKEFEEFFNWLAELTAELAADPVAPTGDPEAARAAREDALAALLAEREPKFEELKKKAEELKKLNNEKYKKLVELFEYAEEVWALLKARAAARAALRALRAAGAPAAALAAARAAAAAALAELRAQAPEVEKRKEELKKVVEEILK	1.35524	90.6171	0.370647	0.2987	556.654	598.332	623.428	592.805	33.7281
341	SpecAI_78_69863		EEEEIKKFVVEFKKYFDWLAERTKEIAADEVEESGDPEAAREKKEEELLKELEEREPIFKKLVEKLEKLKELNDPLFEKLVEHGEYLKEIWALFKERAAAFKEIQKLKAEGAPAAEIAAARAKLDAATAKLKAIAPEVEKKREEVEKVVEEILK	1.16572	91.1471	0.360398	0.3312	679.626	564.511	534.029	592.722	76.7886
62	SpecAI_78_47250		EEEEIKQWVVDFEEFFTWLAELTAEIAEDRVEPSGDPAAARAARMDEILKELEKRKPEWEKLKAKTKELAKLKHPLYEKLVELAKFAEEVWALFEAMAAAYRKLKALLAEGAPEEEIKAALAALKAARAELRARAPEVAARREELKAVVAEILA	0.913784	92.5866	0.363996	0.3442	565.849	595.827	614.432	592.036	24.5125
121	SpecAI_78_67514		EEEKLKKFVKDFEKFFNWLVELTKEVAKDEVEDSGDPAAARAKREEELLKEFEEKEPEFKKLKEEAKKVEKLNHPLFKKLVEFFKKAEEVWAKFKALAAAFKELQALLASGAPQAEIDAAKAARDAARAELKAMAPEVEKLKEEVEKVVKEILE	1.14635	91.0325	0.362243	0.3182	595.895	608.667	571.115	591.892	19.0936
7	SpecAI_78_240		EEEKILQFVKDFKEFFNWLAELTEELAADRVEPTGDPEAARDARFAELAARAEERKPVFEKLKEEAKKLKELNHPLFKKLVELSEFAEKVWAKHEALLAAHAALRALRAAGAAPEAIAAAQAARDAALAELQAMAPEVKEKKKELEEVVKKILE	1.43142	90.057	0.359578	0.3312	603.881	549.742	621.106	591.576	37.239
86	SpecAI_78_22073		EEQEIKQFVIDFKEFFDWLAEKTKEIAEDKVEPTGDPEAAREAKFDKLLEELKKKKPIFEKLKKEAEKLEKLNHPLFKELVKLFKYAEEIWKLFEELAAAYKALKAAKAAGAPAEEIAALEAKRNAAIAKLKAIAPEVEKKKEELEKVVEKILK	0.898231	90.9433	0.353169	0.3506	649.922	587.026	537.701	591.549	56.2471
352	SpecAI_60_24836		ELKEWAKEFDEYDKWLDEKLKELEAFPVKPTGDPAAEIFAQLDKLLEELEKKKPIFEKLKKEGEKIKELNDPKLKVIVERLELNVKLWEMFEELAKHYKELKKKLAAGEITKEEALKELLKKLKELKEKNKEVFKKREEIKPEADKAIEEIIS	1.31158	91.0246	0.349145	0.3399	623.599	575.074	575.905	591.526	27.779
351	SpecAI_78_97846		KEEEIKNFVIEFKEYFEKLAKKTKEIAEDKVEPTGDPAAARAARLDELEKEFEKDKPKFEELKKKAEELKKLNNELYKKLVELFEFAVEIKDKFEKLFAARAALKALKAAGAPAAEIAAAAAAAKAAEEELKAKAKEVEEKKKELEEVVEKILK	1.21278	90.6793	0.360194	0.3117	614.821	549.901	607.811	590.844	35.6305
134	SpecAI_78_94125		EEEKIKQFVKDFKEYWEKLVKLTKEIAEDKVEPTGDPAAARAAKMDKLLEEYKEDKPKFEELVKEAEKLKELDHPLYKKLVELFEYAKEVRALFEELFAAYEELKALEAAGAPAAERAKARAAMAAAKAKLKAMAPEVEEKEKELKEVVEKILK	0.976346	91.5191	0.357715	0.3377	629.645	557.217	584.532	590.465	36.5763
219	SpecAI_78_26443		SEEEILEFVKEFEKLWKKFVELTAEIAEDKVEDTGDPAAARAEKEKKLLEEFKELEPEFKKLKEKSKKLKELNHPLFKKLVELAEFMEEVWELFKAYFAAFKELEALKASGAPAAELAAAQAKRDAAHAKLKAMAPEVKKREEELKKVVEKILK	1.23913	91.4567	0.360816	0.3377	598.636	548.335	623.773	590.248	38.4125
226	SpecAI_78_2247		KSEEIKQFFIDFKKYFDWLVKTTQEIAEDKVEPTGDPEAARDAKFDKLLEEKKKKEPEFKKLEEKAEELKKLNHPLYKKVVELFEFAKEVWEKFEKLFAAYEKLKKLKAEGAPAEEIAKARAERDAVKAELKAKAPEVLAKKEELEKVVEEILK	1.04491	90.7236	0.347872	0.3312	621.652	588.868	558.474	589.665	31.5965
313	SpecAI_78_3919		SEEEIKQFVKDFKEYFDWLVDETAALAANPVAPTGDPAAARAARLAALREAAKEKAPKREELEKKAEELKKLNHPLYKELVKLSEYMKEVWKLHEELLAHEAALAALEAAGAAPAERAAAAAAAAAALAKLQALAPEVAKKREELEKVVKEILE	1.73645	90.7526	0.375553	0.2792	612.792	581.548	571.734	588.691	21.4411
84	SpecAI_60_16746		DLKEWAKEFKEYADWLLERRKELEERPVEPSGDPARAIFERLDELLKEFEKLKPKKKELKEKTKELEKLNKPELKVIVKYAKLCEKEWEAFERLFEAFRELRAKLAAGEISLEEAYARYEEVLKEIEEENKEVYKEIEKIKPEAEKAIEKIIA	1.22658	90.9026	0.352859	0.3333	595.44	613.25	556.651	588.447	28.9404
55	SpecAI_78_6994		KEEEKKQFVVDFKEYFDWLVDRTKELAADPVAPTGDPAAARAEQEEALLKELEERKPKFEELKKKAEELKKLDHPLYKELVKLAEYAEEVWARFEELAAAAKRLRALLASGAPAAEIEAARAARDAALAALRAAAPEVEAKRKELEEVVAKILA	1.07283	91.0607	0.372001	0.3312	613.373	559.387	591.885	588.215	27.1797
91	SpecAI_78_88550		EEARIKQFVVEFNEAWKWLAEKTEEIAEDKVEDTGDPEAARAAKFEKLLKEFEERKPKKEKLLKEAEKLKELNDPLYKELVKLSEFFKEVWEKFEALFEAYKKLKKLKAEGAPEEEIKKAKDEMNAKLAELKAMAPEVKAKEEELKKVVEKILA	1.06711	90.1671	0.356189	0.3117	584.952	563.173	616.087	588.071	26.5946
290	SpecAI_78_99853		EKEEILQFVKDFEKFWEKLVARTEELAADPVAPTGDPEAARAAQEDALAAEMKADKPEFEKLLEKAEELKKLNDPLYKKLVELVEYAKEVWAKFEALAAAAAALRALRAAGAPAAELAAARAKREAALEELKKEAPLVKKRREELKKVVAEILK	1.39079	90.5943	0.364905	0.3182	587.779	511.619	663.429	587.609	75.9053
314	SpecAI_60_75102		EVRQWAKDFKEYWDWLEEKEKELKKFEIKESGDEIKEIFKKLEEYEKELKEKKPKWEKLKKKGEELKKLGHPLYKVVVEQLELAEKIRDRFEELFKHFKELKEKLEKGEISLEEAGKLLLEKLEELEKKYEEVYKKAEEIKPAADAAIAEIIA	1.8577	92.3272	0.338166	0.3399	608.164	566.97	586.82	587.318	20.6018
275	SpecAI_78_2920		EEERIKEFVVEFKELWDWAVARTAEIAADVVEPTGDPAAARAARLAELLKEAEERKPKFEKLKEEAKKLKELKHPLYEKLVEHAEYLEEVWAKFEAMFAAFKEIQALKAAGAPQAEIDAAVAKLKAAEAELKAAAPEVAARDAELKEVVAEILK	1.02016	91.0523	0.361837	0.3312	559.139	598.018	603.75	586.969	24.2712
33	SpecAI_78_35718		SEKEIKEFVKKFYEFFEWLVKKTKEIAEDKVEDTGDPAAARAKKLEKLLEEYKKKEPIFEELKKKAEELKKLNHPLYKKLVKLFEYAKEIWEKFKKLFEAYEKLKKLEAEGGPKEEIDKARAEAAAAHAELKALAPEVEKKEEELKKVVEEILK	0.874703	90.6081	0.350088	0.3247	566.289	628.637	562.669	585.865	37.0859
255	SpecAI_78_97722		EEEKLKQFVVDFEKFFNWLVERTAELAADPVAPTGDPEAARRAQLARLREELKERKPKKEELMKEAEKLKELNHPLFKELVKLAEYAKEVWEKLEALAAAFAELERLEAEGAPQEEIDKARAAMAARLAELQAMAPEAEKRKEELKKVVAKILA	1.33155	92.496	0.352175	0.3442	552.834	601.729	599.214	584.592	27.532
296	SpecAI_78_85868		MEEEIKEFVKKFEEFFNWLADRTAELAAAPVAPAGDPEAALRAREAALRAELAERAPLREELFKKAEELKKLDHPLYKELVELAEFAKEVWARLEELAAAAARLEELEAAGAPAAEREAARAARDAALAELRAMAPEVEARKKKLKEVVEKILA	1.50653	93.7047	0.355611	0.3312	580.243	619.915	553.386	584.515	33.4698
288	SpecAI_78_69459		SSKEILEFVKEFKEFFDWLADKTKEIKEDKVEETGDPEKAREEQEEKLLEEFKKKEPEFEKLLEKAEKLKELNHPLYKKLVELSEFMKEVWELFKKYFEAFKKIKELKAKGGPKEEIEKARKERDKYKKKLKDMAPEVEAKREELEKVVAEILA	0.950631	90.5881	0.348978	0.3506	567.824	593.12	591.629	584.191	14.1935
342	SpecAI_78_1913		EEEEKKQFVVEFNEFFDWLAERTAEFAADPVEPTGDPEAAREARLAKLAAEAKERKPKFEELMKKAEELKKLNHPLYKKLVELAEFAKEVWALFEALLEAFAALRAGRAAGAPKAELDAARARREAALAEIRALAPEVAARREELKKVVEEILK	1.02583	91.2517	0.351512	0.3117	595.776	589.313	566.482	583.857	15.3904
80	SpecAI_78_89864		EEEELKQFFVDFKKLFDKAADLTKLLAEDPVEPTGDPEAARERRLAELEEELKKLEPEFKEIMEKAEKLKELDHPLYKEVVKHAEYLKEVYAKFKALAAAFAALKALKAAGAPEEEIAAARAEMEAALAELKAMAPEVEARKEEVEKVVAEILK	1.17149	91.2926	0.366221	0.3182	592.691	552.667	606.124	583.828	27.809
250	SpecAI_78_69065		EEEKIKKFVKDFKEFFDWVAERTKELAEAKVEPSGDPAAAIAARAAKLAEEAAKQEPKFKELKEEAKKLKELNHPLYKELVEHFEFLEEVWARHAALRAKGAALAALRAAGAAPAERAAALAAAAAALAELQAQAPEVEERKEKVEKVVEEILK	1.89835	90.5308	0.354643	0.3052	542.496	585.894	622.746	583.712	40.1692
22	SpecAI_78_44751		KEEEIKEFVKEFKEFFEWLAKRTAEIAANPVAPSGDPEAELDERLAKLLEELKEKEPKKKELFEKAEELKKLNHPLYKELVKLSEFAKEVWALFEELAAAHAALKELRAAGAPAAEIAAARAKRDAALAKLQALAPEVKEKEKELKEVVEKILK	1.32558	90.692	0.355049	0.3182	617.696	572.275	559.749	583.24	30.49
69	SpecAI_78_18639		EEEEKKKFVKEFEEFWEWLVARTEELAADPVAPTGDPEAARRAQEEKLLEELKEREPLRKKLEEKAEKLKELDDEKYKKLVELSEFAREVWALLEELAAAFRRLQALEAAGAPAAERAAARAARDAALERLRAMAPEVAARREELKKVVKEILE	1.26622	91.5975	0.348251	0.3377	597.695	570.891	579.65	582.745	13.6674
194	SpecAI_78_24075		EEEKLKQFVVDFEKYWKWLVAKTKEFAEDKVADTGDPAAARAAQMEKYRAEMAERKPEFEKLLKEAEKLKKLNHPLYKELVKLAEFMAEVRALFEALFAARDRLAALKAAGAPAAERAAAAAEAAAAHAAIKARAPEVEAREKELAEVVAKILA	1.53438	90.3484	0.36708	0.3312	609.443	555.013	583.734	582.73	27.2286
45	SpecAI_78_23086		KEEEIKEWVKEFEEMFNWMADTTAALAADPVADTGDPEAARDEQFAKLLAEMKEKEPLFKKLMEKSEELKKLNHPLYKELVKLSEYMKEVWEKFEKLAAAFEKEQALKAAGAPAAEIAAARAERDAALAELQASAPEVEKRKEELKKVVEKILK	1.20964	91.3061	0.358767	0.3247	563.251	589.446	594.702	582.466	16.8469
10	SpecAI_78_40628		SSEKIKQFVLDFEKFWKWLAERTAALAADPVAPTGDPEAARAEQEEALLEELKKRKPEFEELKKQAEELKKLDHPLYKKLVELAEFAERVWALFERLAEAFAELKALEAAGAPAAERAAARAARDAALAELQALAPEVAAREKELKKVVEKILK	1.18307	90.2428	0.362777	0.3312	580.115	569.609	593.415	581.046	11.9303
139	SpecAI_78_33683		EEEEIKQWVVDFNAYFNWLVDKTKEYAEDKVEDTGDPAAARAEKEKKLLEEFKERKPKFEELKEKSKELKKLGHPLYEKLVKLSEFAEEVEALFKEYFAAFKEIEKLKAEGAPAEKIAEAAAKRDAALAKIKAMAPEVEKKRKELEAVVAEILA	0.947024	90.0909	0.370048	0.3247	570.912	594.529	577.592	581.011	12.174
258	SpecAI_78_39128		SEKEILEFVKEFKEYFEWLVKTTEEYAADVVEDTGDPEAARDAKEEKLLEKLKEKEPKFKELKKKAEELKKLNHPLYKKLVELFEYAEEVWELFKKRAAAFNEIKALKASGAPQEEIDKAKAARDAALAKLQAIKPEVEERRKELEEVVKEILE	1.35316	91.6331	0.355164	0.3312	584.217	591.501	564.063	579.927	14.2132
97	SpecAI_78_7422		SEEEIKQFVVDFKEFWDWLVDRTAALAEDVVEDTGDPAAARDAQAEKLLAELEKRKPIFEELKKKAEELKKLNHPLYEKLVELSEFAVEVWARLEALAAAHRALKALRAEGAPQAEIDAAQAARDAALAELRAAAPEVAARREELEKVVKEILE	1.25163	91.5908	0.362718	0.3117	534.238	622.777	581.759	579.591	44.3095
146	SpecAI_78_12080		KEEEIKEFVKEFKEYFNWLADKTAEIAEDVVEPTGDPAAARAARRDALLAEMKEREPKFEKLKKKAEELKKLKHPLYEKLVELFEYAEEVWAKFRALAAAYEALRALEAAGAPAAERAAARAKRDAAVAELKAQAPEVEAKKKELEEVVKKILE	1.80545	91.5695	0.346616	0.3247	636.995	547.209	554.252	579.486	49.9291
338	SpecAI_78_8623		EEEKIKQFVKDFLKFWKWLVKKTQEIAEDKVEDSGDPEAEREKKMEKFLEEMKKREPEFEKLMKEAEKLKELNHPLYKELVKLAEYMKEVWALFKELAEAYKKLKELKAKGAPKEEIEKAKKKMDEVKQKLKDRAPEVKEKEKEAEKVAEKILK	1.07273	91.2766	0.354546	0.3312	629.12	525.143	580.63	578.298	52.0279
304	SpecAI_60_59673		EVRQWAADFQEFLDWLLKRLEEFKKFILEPSGNPELELFKQLDKLKEELEKKKPEFKKLMEQTEKLKELNRPEYAVIVEMAELAKKIWEMFEKLFEHYEELKKKLESGEISLEEAYKEFLKKVEELLEENKEVLEQLEKLLPAAEAAIAALLA	1.81509	91.4615	0.349994	0.3333	584.999	584.129	565.594	578.241	10.9612
123	SpecAI_78_62096		EEEKLKKFVKEFYEYFEWAAEYTKELAEDKVEETGDPEKAREEKEKERLKKYEERKPKFEKLKKELEKLKKLNHPLYKKLVEYGEKLEEIEKLFEEYFKAYKKIQELKAKGAPKEEIEKARKERDKYLEKLKKIAPEVEKLLEGVKKVVKEILE	1.07267	90.7867	0.356292	0.3377	554.794	568.16	611.396	578.117	29.5858
102	SpecAI_78_15446		SEEKLQKFVKEFQEYFEWLAEKTKEFAEDKVEDTGDPAAAREAKMEELMKEFKEKEPKFKELLEEAKKLKELDNPLFKELVELSEYAEEIWKLFKDLMAAFAALKALRAAGADPAAIAAAEAARAAKLAEIKEKAPEVEEKLKKLKEVVEKILK	1.23982	91.799	0.356928	0.3506	592.549	526.099	615.405	578.018	46.3926
233	SpecAI_78_35873		SEEEIKNFVKEFEEYWNWLVELTKELAEDKVEPSGDPEAERAKKFAKLKEEFKEKEPKWKELKEKLKELEKLNHPLFKKLVELGKYAEEVEEKLKALFAAFAELEKLKAEGAPAEEIAKARAKRDAALAELKAMAPEVEERKKELEEVVKEILE	1.41174	91.0981	0.353554	0.3182	579.81	581.77	571.538	577.706	5.43085
308	SpecAI_78_92027		KEEEIKQFVIDFKKFFDWLVARTKEIAADPVEPTGDPEAARRAREKELLAELKEKEPEFKKLAEKAEELKKLNHPLFKKLVELFEYAKEVWALFKERAAAFEKLEELKASGAPAAEIEKARAELEAIKAKLKAEAPEVEKRKEELEKVVEEILK	1.07517	90.3551	0.363924	0.3117	543.205	604.982	583.777	577.321	31.3903
118	SpecAI_60_64354		DIKEFAKEFKEFNDKLLKLEEELKEFKVEESGDPIAEIFKKLDEVEKEFEELKPKKEELKKKSKELKKLKKPEYEVIVKLSELNEKIWERFEKLLEKYKELKKKLESGEISKEEAYKRLLEKLEELEKEYEEVEKERKEILPEAEEAIEKIIK	1.42335	91.119	0.340406	0.3595	561.894	605.773	561.745	576.471	25.3764
129	SpecAI_78_31770		KEKEKLEWVKKFKEFFEWAAERTALLAADPVEPTGDPAAARAAREAALLAELKERAPEFKELMEKSEELKKLNEEKYKKLVELSEFLKEVWALFEALAAAGERLRALKAAGAPAAEIAAAAAARDAALAKLRALAPEVEARKEELEKVVEEILK	1.20056	91.7518	0.362993	0.3247	521.218	660.072	544.52	575.27	74.3593
76	SpecAI_78_66636		EEEKIKEFVKRFEEFWNWLVERTAELAADAVAPTGDPAAARAAREAALRAEAAERAPEFAELKKEAEKLKKLDHPLYKELVKLSEFAEEVWALHAALLAAAAALEALLAAGAPPAARAAARAERAARLAELRARAPEVEERRKELEKVVEKILK	1.87902	90.2119	0.372857	0.3117	525.526	662.187	536.301	574.672	75.9821
93	SpecAI_78_21455		EEEKIKEFVKEFEEYFEWVVKRTRELAADPVAPTGDPEAARAARAAALAAEAAERKPKFEKLVEESKKLKELNHPLYKKLVELSDYLVEQRALFERLLAAEAALRALKAAGAPAEEIAAARAERDAALAELRARAPEVEKREKELKKVVEEILK	1.41049	90.2441	0.35753	0.3312	574.466	597.318	550.559	574.114	23.3814
43	SpecAI_60_34509		SVKEWAKKFKEFYDWLKERLAEFKKFEVEESGNPVEEVFKKLEKLLEELKKREPEFEKLKKESEKLKELNDPKYKVIVKQSEVMEKIWEMFKELAEHFEELKKKLEAGEISLEEAYELFLKKVKELLEKNKEVLEEAEKIEPEAEKAIEEIIA	1.99069	91.0286	0.348159	0.3333	572.215	543.909	604.388	573.504	30.26
299	SpecAI_60_15344		EVREWAKEFKEYLDKLLERLKELKAFPVEPSGDPARALFEKLDERLKELEKEKPKFEELMKKTEELKELKKPEYEVIVKMAELAKKLREMEEKLAAHYKELKAKLASGEITLEEALAEYRKKLEELLKENEEVLKETEEILPEALKAIEKIIA	1.80478	92.1033	0.346814	0.3725	542.808	592.754	584.332	573.298	26.7387
160	SpecAI_60_64153		ELKEFAKKFNEFLEWLLEREKELEKFEVKESGNPAAEIFARLDKYLEELEKRKPVFEELMKKSEELKEKNTPELKVIVKMSELAKKIWARFERLAEAYKRLKEKLASGEITEEEALAEYLKVLKELREENKEVYKEREKILPEAKKAIEKIIA	1.94721	90.81	0.340308	0.366	600.893	487.165	630.715	572.925	75.7519
171	SpecAI_78_16671		EEEEIKQFVVEFKEFFDWLADKTKEIAENKVEDTGNPEEAIEKQLEKLLEEEKEKEPIFKKLMEKSEKLKKLNHPLYKELVELAEKAKEIWKLFKELFAAFEKIKKLKAEGGPKEEIDKAKKEMNAKLKELQAKAPEVEALRKKVDEVVEKILK	1.2389	90.2594	0.351327	0.3442	531.471	570.761	615.82	572.684	42.2077
106	SpecAI_60_55690		EIKQWAKDLKEYGDWLEEEEKELEEFEVEPSGDPTAAIFAKLDKLMEELKKRKPIFEKLMKKTEELKKLNHPKYKVIVKYAELLKKIEEAFKELAKHYAELKAKLAAGEITPEEAYEELLAKMKEIREKNKEVYKEREEIKEEAEKAIEEIIK	1.99988	92.7649	0.355818	0.3595	604.618	529.384	583.128	572.377	38.7524
189	SpecAI_78_10844		KSEELKEFFKKFYEFFKELAEETKEIAEDKVEPTGNPAAARAAKMEKLLEKYKKRKPIFEELKKKAEELKKLNNPLYKEVVKLFEFAKEVWELFKELFEAFEKLKKLLAEKADPAAIKAELAKMKAAKKKLKEMAPEVEEKEKKLEEVIEKILK	1.23539	91.991	0.351947	0.3377	560.614	575.447	578.027	571.363	9.39789
108	SpecAI_8_57306		SEEEKEFKEELEELLKNIEEKSKEIVEITEEYLKNKSEENRKKFIEAFEEVSNFIEKLEKLEKKNPVFESGDPEKEKKKIEEKFLEAFKLLEPAFEGLKKCSEILKKENKPEYKEIVKKFEELEERWKKFKEKREKFEKE	1.44905	90.8002	0.352937	0.3071	578.553	585.704	546.404	570.221	20.9334
138	SpecAI_60_43988		EIKEFAKEFKKFSEWLEERLKELEEFKVEESGNPAKAIFEKFEKLLKELEERKPEFEKLMKKAEELKELKKPEFEVIVKQAELDKKIWEMFEELAEFYKELQAKLEAGEISEEEALEKFLEKLKELKEKNKEVLEEREKIKPEAEKAIEKIIA	1.27743	92.4556	0.346194	0.3529	552.875	551.85	602.142	568.956	28.7446
344	SpecAI_78_50757		EEEEIKNFVKEFEEFFNWLADRTAEAAADVVEPTGDPEAARAARLAALRAELAARKPKWEELLKKAEKLKELNHPLYKKLVEHVEYAKEIWDLFTAAAAADAELAELRAAGAPKAARDEAAAKLAAAEAEIKAIAPEVEARRKELKEVVKKILE	1.12372	91.2922	0.370323	0.3052	558.046	592.368	556.054	568.822	20.4153
153	SpecAI_78_43170		KEEEIKQFVLDFEKEFNWLAERTEEIAADKREPTGDERAALAKKMDEWLKERKERKPKFEELMKKAEELKKLNHPLYKKLVELAEFMKEIWAKFDALFAAYEKLRALEASGAPADERAAALAAMKAAHAELKAKAPEVKERKKELEEVVKEILK	1.69009	91.3982	0.354892	0.3312	548.22	481.707	676.515	568.814	99.0232
280	SpecAI_78_46727		SSLEKKQFVVDFEEFFNKLAARTAEVAADPVAPTGDPAAARAERRDKLLAEFEKDKPKFKELEEKAEELKELDDPLYKKLVELSEFAKEVWAKFEKAAAAYQKLKKLEAEGAPAAERAAAAAELAAAEAELKAMAPEVEAKKEELKKVVAEILK	1.17771	90.727	0.358219	0.3117	649.717	539.14	517.193	568.683	71.0303
329	SpecAI_78_43742		EEEEIKQFVVDFREYFNWLAERTAELAADKVEPTGDPAAARAKQLDELLKEFEERKPKWEELEKKAEELKKLKHPLFEKLVELAEFAKEVRALFEKLFAAVKKLKALLASGAPQAEIDAAAAEAAAVHAELKALAPEVEARKEELDKVVEEILK	1.0324	90.2648	0.350618	0.3247	574.405	566.249	564.662	568.439	5.22732
350	SpecAI_78_12960		KEEELKEFVVEFKEYFDWLAERTQELAANPVAPTGDPEAARDARMAAFLKELEERKPKFKELMEKAEELKELNHPLYKKLVELAEFAKEVWALFEELAAAHAALAALRAAGAPAAELAAARAARDAALAALQARAPEVEAKRKELEEVVKKILE	1.18133	90.1875	0.355661	0.3182	593.229	522.165	584.069	566.488	38.6572
291	SpecAI_78_80631		EEEKIKQFVKDFKEYFDWAADRTEEIAADPVAPTGDPAAARAARLAALAAEREKRKPLFEKLLKESEKLKELNHPLYKKLVELMEFLEEVEALFDELFAAFARLAALKAAGAPAAERAAAAAAARAARAALKARAPEVKARREELEKVVEEILK	1.83328	91.2934	0.369213	0.3182	567.084	570.383	558.718	565.395	6.0131
328	SpecAI_81_13099		MKSPKEALKEEKEKKLPEVKEEVEKKLAENKEKTIELFKKLFEIFEAIVKLLKKLLKLNIKPDTGDEEKALKKVFEILIKLFDVLLPIFLYLSVMAEYLKKLNKPEYKEIVKRFEKVKEEWEKFEELRIEFLSS	1.52737	90.2058	0.380735	0.2761	605.608	485.206	596.622	562.479	67.0705
193	SpecAI_78_47483		KEEEIKEFVKKFEEFFKWVADRTAEIAADEVAPTGDPEAARRARAAELLAELEKRKPEFEELMKKSEELEKLNHPLYKKLVEISKFLKEQWALFEALAAAEREIAALEAAGAPAAAIAAARAKAAAARAELKAKAPEVAAKEKEAKEVVEKILK	1.1734	91.2319	0.364932	0.3182	588.666	533.19	564.594	562.15	27.8184
144	SpecAI_78_43289		EEEEIKNFVKEFYEFFKWLAERTKEIAEDKVEDTGDPAAARDAREDELLKEFEKKKPKFKELMEKAEKLKELNDELYEKLVELAEYMKEVWALFEARAAAYKEIKALRAAGGPAAEIAAARAALDAAVAELKAIAPEVEKKEKELKEVVEKILK	0.867716	92.0252	0.365016	0.3117	596.968	484.008	597.011	559.329	65.2298
145	SpecAI_60_29373		ELREWAKEFREYSKWLEERLKELKEFPVEESGDPVKEIFKKLEKLLEELKEKKPKFEELKKKSKEIEKLNHPKYKVIVEYSKLNEKLWEMLEELAKHFKELKKKLEAGEITLEEAYKLYLEKLKELEEKNKEVYKEREEIKPEAEKAIEEIIA	1.90893	91.1089	0.33238	0.3595	580.597	578.89	518.426	559.304	35.4117
83	SpecAI_93_75465		EEEKKILEEFKKMEENIEEDMKEMVAAAKAFLATKSPADREAWKKNFEKFNHYLEVLEKLEELNIVEPSGDEEKAIKERNEKILKMYELMKPAKEGLAACAKILKKENTPENKELVKKAEEAEKKWEKFKKKAEEFKKE	1.60877	90.1532	0.351912	0.3237	574.612	573.663	528.73	559.002	26.2204
29	SpecAI_60_25386		SLKEWAKEFKEFSDWLDEKLEELEAFPVEPSGDPAAAIFARLDELAKEAKKREPLFKELKEKSEELKKLNHPKYKVIVKQSELDVKLWEALKELLKHYAELKAKLAAGEISREEALRLYLEKLKEIKEENKEVLKEREKIKPEADKAIEEIIK	1.43648	91.1742	0.351258	0.3268	532.772	548.203	593.965	558.313	31.8244
334	SpecAI_78_94742		SEEELLEFVKRFKEYFDWLVARTAELAKDVVEPTGNPEAARRAKEAKLAAELKERAPEFEKLLKEAEKLKELNHPLFKELVKLAEFMKEVEAKLQALAAAAAALEKLEAEGAPAEERAKARAAREAALAELKAMAPEVEAKRKELDKVVEKILK	1.5074	92.0616	0.365111	0.3052	547.916	578.693	546.771	557.793	18.1085
174	SpecAI_93_56748		SELEKLLKELAEIRANIEETAKKIVENTKEFLENNTPEAREKFIEDFETVSRFLELVEKYLEADLVEETGDPEAARAAQEAVLLEMLELLAPAFEGLKECAKILEELNEPEYKEIVEKFKEAEKKWAELEARAAAFRAA	1.67062	92.3474	0.366127	0.3237	526.147	599.159	536.389	553.898	39.5298
111	SpecAI_60_7918		EVKQWAKDFKEFVKWLEEKLKELEKFEVEESGDPIAAIFKKLDKLLEELKKRKPEFEKLKKKSEELKKLNKPEYKVIVEYSELAEKLWEMFEELAAEFEKLKAELAAGKISKEEAGKRLLEKVEKLKKENEEVYKEFEKIKPEADKAIEKIIA	1.42536	90.5363	0.345416	0.3464	572.534	553.834	532.277	552.882	20.1452
261	SpecAI_78_16686		SEEEIKEFVKEFEEFFNWLVEHTERIAENKVEDTGDPEAALAAQEKKDLEELEKKKPKFKKLKEKAEELKKLNDPLFKELVEISEFAVEIWELFEERAEYFKKLQELLAKGAPQAEIDEVAAKKKAAEEKLKAKAPEVKAKKEKLKEVVEKILK	1.14784	90.9003	0.351122	0.3636	528.297	566.9	550.665	548.621	19.3827
49	SpecAI_60_83336		EVKEWAKEFQEFSDWLEEKEEELEKFEVEETGDPVEAVFAKLDELLKEFEKRKPKFEKLKEKTKELEKLNTPEYKVIVKQAELDEKIWEAFEELFKFYKELKEKLEAGEITKEEAGKLLLEKKKKIEEENKEVKKEREKIKPEAEEAIKKIIA	1.86599	90.1496	0.341983	0.3464	443.145	586.367	603.827	544.446	88.1625
277	SpecAI_78_30264		KEEEIKQFVKDFKKFFEKLAATTQEIAADVVEDTGDPEAARREKLKKLLAQLEKDKPEFKELMEKAEELKKLNHPLFKKLVELAEKAKEIWAKFEALAAAFKEEEALLAAGAPAAEIEAAKAAAEAKRQELQDMAPEVEKLKEELEKVVEEILK	1.33405	90.7072	0.370475	0.3117	540.667	601.946	489.768	544.127	56.1689
330	SpecAI_78_95135		MEEEIKEFVKKFEEFFNWLAELTKWLAEDPVEPTGDPEAARAARFDKLLAELKEREPEKKELFEKAEELKKLNHPLFKKLVELAEFAKEVWALLKALAAAFEARRALLASGAPASEIAAARAAEDAALAELRARAPEVEKRKEELKKVVEEILK	1.20738	91.5918	0.35138	0.3442	546.509	542.164	518.058	535.577	15.3267
23	SpecAI_60_82345		EKKEFAKEFKEFDDWLDERLEELKKFKVEETGDKAKAIFEQLEKLLKELEKKKPKFEELKKKSEELEKENDEKYKVIVERSKLNEEIWKMFQELEKHFKELKKKLESGEISLEEALKEFLEKVKKLFEENKEVFKKREKIKEEAEKAIEEIIK	2.05444	92.3667
155	SpecAI_78_61062		EEERIKEFVKEFKEFFDWLAAETAEIAADPLAPTGDPEAARDARMDERLAKMKEKKPLFEKLMKEAEKLKKLNHPLYKKLVEIAEYAKEVWAKFEAMAAAYEKLKELKAKGAPKEEIDAARAKLAAARAQLKAMAPEVAAKRKEAEEVAEEILK	2.11467	91.1645
274	SpecAI_60_38264		EVKEWAKEFKEFWDWLEEKEKFLKKNPILPSGDEIKEIFKILDELEKEFKEKKKKKEELLKKTEELKKLGKPEYAVIVKYAELAKKIWEMFEKLFEHYKELKEKLESGEISLEEAGKELKKKREELEKENKEVYKEREKIKPEADKAIKKLIA	2.10008	90.7798
3	SpecAI_8_78367		DEEYEEFREEVEELLEDAEEWSKEAVAATAEFLATRTPEAIAKFIEVFERIEKIFERLEELLKKNPRFPTGDEEAEKKRIMEKFIELFELLKPAMEGLAKAAEILKKLNTPEFKEIVKRFEELKKKWEEFEKLIAKFKAE	2.83446	90.6558
195	SpecAI_78_47345		SEEEEQQWVKEFEEFFTWLAARTAEVAADPVAPTGDPEAARAARRAALAAELAELKPKFEELLKKAEELKEKNHPLYKELVEHVEFAKEVWALFEEAAAAAKALEELKAAGAPAEERAAARAALNAALARLRARAPEVAARLKEVKAVVEKILK	2.04471	90.5682
266	SpecAI_78_51713		EEAKLKQFVVDFKKYFDWLVDHTKEVAANKVEETGDPEAAIDAKMKKDLEKYKEKKPEFKKLKEEAEKLKELGDPLFAKLVELFEFAEEVWKLFEELFEAFEKLQALKASGAPQEEIDKAKAERNAALAKLQAMAPEVEAKRAELDEVVAKILA	2.09234	90.3796
216	SpecAI_60_2396		EEKEFAKEFKEFSEWLEKKLEELKKFEIKESGDPVEALFEKLEEYLKEFEELKPKREELEKKAEELKKKNEPKYEVIVKQAEVNKEIWEMFEKLKKHVKELKEKLASGEISKEEAYEELLKKIKELNEENKEVLKKAKEIKPEAEKAIEEIIA	2.11537	90.0922
66	SpecAI_78_27326		EAEKLKQWVVDFKEYWDWLAAKTAEVAADKVEPSGDPEAERDKQFEKLLEELKEKKPVRAELEAKSEEVKKLDHPLFKELVELSEFAKEVWALFEELAAAYERLKALRASGAPAAELAKARAERDAALAKLQALAPEVAARKEKLDAVVAKILA	1.05339	89.9968
241	SpecAI_78_15106		EEEEIKQFVVDFEKYFKWLAERTKEYAADPVEPTGDPEKARREKEEKLLEELKKKEPEFKKLKEKAEKLKELNHPLYKELVKLSEFAVEVWELFKELAKYFKEIQELEKKGAPKEEIDAAKKKRDEALKKIKEIAPEVEEREKELKKVVEEILK	1.22337	89.9816
303	SpecAI_78_49021		EEKEIKEFVKKFKEFFNKLAETTAEIAADPVAPTGDPAAARAARLDALLAEREKLKPEKEKLMKEAEKLKELNHPLFKKLVELAEFAKEQWELFDALFAAFRALKALRAAGAPAAELAAAAAAMAARRAELRARAPEVAEKKKELDEVVEKILK	2.02839	89.9802
208	SpecAI_78_28500		EEEELKQFVIDFEEFFLWLAEKTKELAEDPVEPTGDPEKARAERMAEFRKEMEEKKPKFEELKKKSKKLEELNDPLFKELVKLSKFAEEVWAKFEALAAAEAKLEELLASGAPQEEIDAAKAAADAALAELQAQAPEVEAKEKELKEVVEKILK	1.05055	89.9682
349	SpecAI_60_79675		DVKEWAKELKEFGDKLLKRLEELEKFPVEPTGDPAAAIFAKLDKVEKELEELKPKFEELKKKTKELKELNKPEYKVLVKYAELLEKIWEMIEELMAHYKELKAKLAAGEITKEEALALYLEKLKELKEKNKEVYEELEKIKPEAEKAIEKIIK	1.28084	89.9547
20	SpecAI_60_91108		DVKQFAKDFKEFVEKLEKLLKELEENKLEESGNPIEAFFKKLDEYLKEKEKLKPKKKELKEKGKELKKLNKPEYEKIVKMMELAEKVWEMLEKLFEHYKELKAKLKAGEISKEEAYKLYLEKLEELKKENKEVLKKMEEIKEETLKAIEKIIA	1.17844	89.948
281	SpecAI_78_14465		SEEEIKKFVVEFEELFNFLVEKTKEIKEDKVEETGNPEEERFKKLEKLLKKFEELKPKFEELEKKAEELKKLNHPLFKELVKLSEFMKEVWKKFEELFEAFKKIKELLEKGAPKEEIEKAKKEMEEKKKELKELAPEVEEKKKELEEVVKKILE	1.26973	89.9454
26	SpecAI_8_15918		SSKYEEFEKKLEELFADAEERAAEMVAACEAFLAERSPAAREAFLEVFEWFNEWLEKLEELKKENPKFPSGNEEEEIKKIKEKFIKLFELMEPAWKGILACGKVLAELGEPELAEVVERLKEAEKRWEEFKKEIEEFKAS	2.31345	89.9257
105	SpecAI_60_54868		EVREWARRFRELLDWILERLEELKKNEVKPSGDPAKELFKKLDKLLEEMEKKKPVFEELMKKSEELEKLDHPELKVIVKMAKLAKKLWEAFEKLAEHFKELKEKLAKGEISLEEALELYLEKVKKILEENKEVLKELEEVLPEAEKAIEKLEA	2.04674	89.9172
316	SpecAI_78_41733		EEEKLKEFVKEFKEYWEELAELTKEIAKDEVEDTGDPAAARAEKMEKLEAKFKELEPKFKELEEKAEELEKLKHPLYEKLVELWKYAKEVYALFKELFDAFAKLKKLLAEGAPQEEIDAAAAAMAAAKKKLQDIAPEVEERRKELEKVVEEILK	1.12907	89.9168
217	SpecAI_78_85053		SEEKKKQFVVDFNELFDWLADKTAELAANPVEDTGDPEAALAKKLDKLLAEMKEKKPIFEELMKELEKLKKENHPLYKELVELGEYMKEIWAKFEKLAAAVKKLKALKASGAAAAEIAKAKAEADAALAELQAEAPKVEAMREKLKEVVKKILE	1.29695	89.9155
77	SpecAI_78_71655		EEEEIKEFVKEFKEFFEWLAEKTKEIAEDKVEDTGDPVKARFEKYEELLKELEEKKPKKEELFAKAEELKKLNHPLYKKLVELSEFAKEIWEKFEKMAEYFKKLKELLEKGGPKEEIKEALEKLKKAKEELKKIAPEVEKRKEELKKVVEEILK	1.03221	89.9109
1	SpecAI_8_22821		MEKEKEYRERLEKLLKDIKKKSEEIVKATKEFLETKTPEAIKKFIENFEWIEKKFKELEKLLEENPVFDSGDPEKEKAEIEKKFLEMFEYLKPAFEGIKKCAEILAKLNKPEYKEIVKRVKKLEEKWEKFEKRREEFLKK	1.4073	89.8731
339	SpecAI_78_84769		EEEKIKQFVKDFKEFFNWLAEKTKEIAEDKVEDTGDPEAAREKKFEKLLKEYEEKKPIKEKLFEEMEKLKKLNHPLYKKLVELSEFAKEVWKKFEEMFEAYKKLKKLKAEGAPQEELDAARAKLEAKLKELQEMAPEVEKKKEELEKVVKEILE	1.08118	89.8695
95	SpecAI_78_40367		ESEEIKEFVKEFKEFFNWLADRTEEIAEDKVEDTGDPEKAREEKMEEFLKELEEKEPKFEELLKKAEELKKLKDPLFEKLVELAEFAKEIWELFKKLAEAYKKIKKLKAEGAPKEEIDKAKAEAEKYKKELQDIAPEVKKKRKELEEVVKEILE	1.18803	89.8666
179	SpecAI_78_97419		SEEEIKQWVVEFEEYFNWAVEKTEEIAKNPVEDTGDPAAAIAAKFEELLKELEELKPKFEKLMEKTEELKKLNHPLYKKLVELAEYLKEIWKLFEELAKAVKEIAKLLAEGAPAEKIAAAVAKANAKLAELQAKAPEVKKKKEELEKVVKEILE	2.15658	89.8625
305	SpecAI_78_12235		EEEELKEFVEEFEKYFNWLVAETAEIAADPVVPTGNPAAARAAREDARLKELEKRKPLKEKLLKKAEKLKELNDPLFEELVKLVEYAKEIWKLFEELAAHYRALRALEAEGAPAAERAAALAARDAARAALKAKAPEVAEKKEELKKVVEKIKK	1.6132	89.8457
319	SpecAI_78_38561		EEEELKKFVVEFEEFFNWLVELTKEIAEDKVEDTGDKEKAREEKEEKLKKEFKEREPKFKELMEKAEELKKKNHPLYKKLVELAEFAKEVWELFKEYFKYREEIEKLKAEGAPKEEIEKAKKKREEAKEKLKKQAPEVEKKKEELKKVVKEILE	1.63141	89.8401
44	SpecAI_78_49642		EEEEKKQFVVDFNKFFKWAADLTAEIAADPVAPTGDPAAARAARLDGYLEEMKEREPVFKELMKKMEKLKEENHPLYKKLVELAEFLKEVWALFKEMFAAYEALQKAKAEGAPQAEIDALAAKLAAATAKLKALAPEVEKKKEELDEVVKKILE	1.8605	89.8386
103	SpecAI_78_38225		EEKELKEFVVKFEEAFNWLAERTQEIAEDKVEPTGDPAAARAKRMEEYLKEMKEREPLFKELKEKAEKLKELNKEEFKKLVELSEFFVEVWEKFKALFAAYEKLKALLASGAPAEEIAAAQAEMEAAKAELKAMAPEVKAKQEELKKVVKEILE	1.08359	89.8093
321	SpecAI_60_13746		ELKQWAADFKEFLDWLLETLEELEKNEIVETGNPIEARFEKLDKLLAKAKELKPKKEELLKKSEKLKELKKPEYEVIVKMAELAKKLWDMFEKLFEHYEELKAKLAAGEISLEEAGEELEKKIKELKEENEEVLKELEEILPEAEEAIEKLIA	1.35412	89.7932
332	SpecAI_78_33600		KEEEIKEFVKEFEEFFNKLAKLTEEYAENKVEDTGNPEAAIAAKEDKLLAEFEELKPKFEELMKKSEELKKLNHPLYKELVKIAEFAKEIWAKFEARFAAYKKLKALRAAGAPQAELDAAQAAYNAKLKEIQAKAPEVKKKKEELEKVVKKILE	1.09787	89.7901
41	SpecAI_78_12870		KEEELKQFVKDFYKYWKWLADETKEYAADVVEPTGDPEAARAAREDKLLEKAKEKEPIFEELMKKMEEVKKLNHPLFKKLVELAEKAKEVWALFKELQAHYQKLKALKAAGAPAAEIAAAQAARDAALAKIKAMAPEVEAWEKELEKVVEEILK	1.13485	89.7731
173	SpecAI_60_678		EEKEWAKDFKEFLDWLLEKLEELKKFPVEPSGDPVKEIFKKLDKLLEEKKEKEPKFKELLEKSEELKKKNKPEYKKIVEMSELAKKIWEMFNKLFEHYEKLKEKLEKGEITLEQAYEEFLKKLEELEKENKEVYEELKKVLPETEKAIKKIIA	1.89806	89.7565
100	SpecAI_78_70951		EEEEIKEFVKEFYKFFKWLAERTKEIAANPVAPAGDPEAALAAREAALLAELAKREPEFKKLVEKSKKLKELNHPLYKKLVELSEFAVEVWKKLEALAAAAAALAALRAAGAPQAELDAARAARDAALAELQAQAPEVEKKEKELEKVVKEILE	1.37728	89.752
238	SpecAI_78_28204		EEEEIKQFVVDFEKFWKWLAKETAELAADVVEPTGDPAKARAERFDKLLEEFKKRKPEFEELKKKAEELKKLNHPLYKKLVELMEYMERVWEKFEKLFEAYKKIKKLLAEGGPKEEIDKALAEANAALAELKAEAPEVEAKEKELKEVVEEILK	1.11144	89.724
282	SpecAI_78_9677		EEEEIKKFVIDFEKFFNWLAKKTAEIAEDKVEPTGDPEAARAKQMDEFLKELEKKKPEFEKLIEKSEKLKELNHPLYKELVELSEFAKEIWELFEKLAAAYKKLKELKAKGAPAEEIAKAKAEMAAAKAKLKALAPEVKEKEKKLKEVVEKILK	1.00032	89.7092
154	SpecAI_78_18002		EEEELKEFVKRFREFWKWLVDKTKEIAEDKVEETGDKEKAREEKEDKLLKEYEERKPEWKELKEKAKKLKELNHPLFKELVKLVEFAEEIWELFEKYFEYYKKIKKAKKEGAPKEEIDKYKEKRDEAKKKLKEIAPEVEKREEELEKVVEKILK	1.68459	89.7055
244	SpecAI_78_47118		EKEKIQEFVKEFEKFFNWLAEKTKEIAENKVEDTGDPEAALEAKLAKLEEERKKKKPEFKKLKEQAKKLKELNDPLYKKLVELSEFAVEVWEKFDALFAAFAEIRKLKAEGADPAAIAAARAAMEAKKAELQAMAPEVEAKKEELEKVVKEILE	1.10895	89.7046
232	SpecAI_78_22369		EEEEIKEWVKEFKEFFNWLAELTQEFAKDEVEDTGDPEAARDEKLEELEKKYEEKKPKFEELVEKSEELKKLNHPLFKKLVELSEFAKEIWDLISKLFEARKKLKALKASGAPQEEIDAAKAEAEAVLKQIQERAPEVKEKLKELEEVVEKILK	2.23765	89.7018
37	SpecAI_78_86730		EEEEIKQWVKDFEEFFEWLAARTEEIAADKVAPAGDPAAERARRLAALREEQKKKKPIKEELFKKTEELKKLNHPLYKKLVELAEFAKKVWALFEEMFAAFAELEALLAAGAPADEIAAAAAKLEAAREKLKAQAPEVKERLEELKKVVEEILK	1.19321	89.6835
166	SpecAI_78_3580		EEEELKEFVVEFEEYFNWLADRTAELAADPVEPTGDPEAARAARDAELAKELEKQKPKKEELFKKAEELKKLNHPLYKKLVELAEFAKEVWALFEKLAAARAALQKLKAEGAPEAEIAKARAAADAALAELQARAPEVEERREELKKVVEEILK	1.19845	89.6703
162	SpecAI_78_9635		EEEEIKNFVIEFKKFFNKLVELTKEIAADKVEDTGDPAAAIAAKEKKLLEEFEKLKPEFEKLKKKAEKLKKLNNPLYKKLVEIFEFAKEVWELFEKRAAAFKKLEKLKAEGAPAAEQAAAAAERDAVVKKLKELAPEVEKKKEELEKVVKEILE	1.20232	89.6641
289	SpecAI_78_63919		EEEEVQQFVLDFQKYFNWLVDRTKEIAEDPVEPTGDPAAARAARRAKLLAEMKEREPEFKKLMEKAEELKKLDHPLFKKLVELAEYAKEVRKKFEAMFAAEEKLAALLAAGAPAAERAAAAAKLKAAEAELKAMAPEVEKKRKELEKVVKEILE	1.51643	89.6419
251	SpecAI_78_53795		KEEEIKKFVKEFKEFWEWLVARTKELAADPVEPTGDPEAARAARAEKLAAEAKEREPKFEELKKKSEELKKLNHPLYKKLVELSEFAVEVWDLFKALLAAEAALAALKAEGAPAEERAAAAAARDAALAALQALAPEVEEREKELKEVVEEILK	1.35375	89.6281
353	SpecAI_78_40562		SEEELKQFVIDFQEFWEKLAELTKEVAEDKVEDTGDPAAARAAKEEKLLAELEKLEPKFQELEKKAEELKKLNHPLYKELVKLQEFAKEVWALFKERAAAFKELKKLKAEGGPAEEIAAAAAKLAAAHAKLQAMAPEVEAKEKELKEVVEKILK	1.02761	89.6271
2	SpecAI_78_11975		EEEELKEFVKEFEKFFNWLADHTAELAADAVAPTGDPAAARAEREDAFAAELEKRKPEFEKLKKKMEEVKKLDHPLFKELVKLAEYMEEVWALIDRLAAARAALKALEAAGAPAAELEAARAARDAALAELKAQAPEVEKKKEELEKVVKKILE	1.28002	89.6258
34	SpecAI_78_86735		EEEEIKEFVKEFEKYFKWLAERTKEIAEDKVEETGDPEAARDAKEDKLLEEEKKRKPIKEKLEKKMEKLKELNHPLFKELVKLSEFMKEIWKLFEEYFKAYKEIKALKASGAPEAEIKAAIDKRNAAKAELKAKAPEVEEKEKELKEVVKKILE	1.01179	89.6256
343	SpecAI_78_61891		SEEEKQQFVIDFNEFFEELVKLTKEFAADVVEPTGDPEAARDAKMDKLLAKYEKLKPKRKELFEKSEKLKEENHPLYKELVKLSEFAKEVWEKIDKLFAAYKEIKALKAAGAPAAEIAAAKAKRNAALAALKAMAPEVEAKEKELKEVVKKILE	1.07113	89.6015
248	SpecAI_60_52819		DIKQFAKDFKEFSDWLEEKLKELEENKIEESGDPEKEIFKKLEEYLKEFEEKKPKFEELKKKIEELKKLNDPKYKKIVEQAELDKKIWEMFKELFEHFKELKKKLESGEISLEEAYEEYKKKVKELKEKNKEVFEEREKIKEETDKAIKEIIK	1.03377	89.5429
211	SpecAI_78_14544		KEEEIKQWVKDFEKYFNWLADLTKEIAADEVEDTGDPEAARDAKFDKLEEEQKKREPEFEKLMKKSEELKELNDELFKKLVELSEYLKEIWKLLKELFAAYAKLKALKAAGAPAEEIAKARAERDAKLKELKDRAPEVEKKREELKKVVEKILK	30.3044	89.5295
9	SpecAI_60_67549		EDKEFAKELKEFDEWLDEKLEELKAFPVEESGDPIAAVFAKLDKLLEELKKKKPIFKKLKEKAKKLKEKNSPKYKVIVERFELNEKIWEMFEELAAHYKELKEKLAAGEITKEEAGELLLKKVKELEEKNKEVFKEREKIKEEAEKAIEEIIK	1.33075	89.4736
283	SpecAI_78_82393		EEEKIKKFVLEFKEFFDWLVERTKEIAADKVEDTGDPEAARDKKLEEWLKEMEERKPLKEELFKKSEELKKLNHPLYKELVKISEFAKEIWALFEALFAAFKELKKLRAEGAPQEEIDAALAKMKAARAKLKARAPEVEKKKEEAEKVVKKILE	0.878482	89.4559
235	SpecAI_60_22607		EEKEFAKEFKEFFEELLELLKELEKFEVEESGNPIEEIFKKLDELLKKKEKLEPKFEKLMKESEKLKEKNDPEYKVIVELAEEAKKIWEMFKELFEHYKELKEKLEKGEISLEEAGEELLKKIEELKKENEEVYKELEKIKPEAEKAIKKIIA	1.75727	89.4181
125	SpecAI_78_31174		EEEKKKQFVVDFEEFFKWLADRTNEIAADPVAPTGDPAAARAAAEAKLRAEAKEQAAKREELEKEAEELEKLNHPLYKKLVELSKFAKEVWALFDDYLAAAADLDALLAAGAPAAAIAAAAAARDAARAKLKAIAPEVAEKKKELEEVVKKILE	1.45809	89.373
74	SpecAI_78_81571		EEEEIKEWVKEFYEYFKWLAEHTKEIAEDKVEDTGDPEAARAAKFAEWAKEAEEKKPKFKELKEKTEKLKKLNHPLYKKLVEIAEKAEEIWKLHEALLAAEKALEALKAAGAPQEEIDKARAKRDAKLKELQDKAPEVEKLLKEAEEVVKEILK	1.20631	89.3703
157	SpecAI_60_50938		DVKEWAKEFKEFADKIEKLLELLKENPVEESGDPALAVLKKLEELLKEFEELKPKFEELKKKTEELKKLNKPEYEVIVKYAELVEKLWEAFEELFKAVKELKKKLASGEISLEEAHKRLLEKLAEIEERNKEVLKERKEIKPEAEKAIEKIIA	1.0652	89.3344
177	SpecAI_78_28299		EEEEIKKWVVEFEKYFNWLAEKTKEIAEDKVEETGNKTEAIAKKEEKLLEEYKERKPIWEELLKKSEKLKELNHPLYKKLVELVEYAKEVQKLFEEYFEAFKEIKELLAKGAPKEEIEKAKKKRDEYKKKLKEIAPEVEAKKEELEKVVAEILA	1.30416	89.3301
12	SpecAI_78_85153		EEEKIKQFVVDFEKYFKKLAEETKEIAEDKVEPTGDPAAALAAREEKRLEELKKDKPKFKELEKEAEKLKELNHPLYKELVELAEFMKEVRAKFEELAAAFEKIKALKAAGGPAAEIKAALDARNAARQELKDMAPEVEEKEKKLKEVVEKILK	1.07057	89.3225
298	SpecAI_78_95791		EEEKIKKFVKEFEEYFKKLADWTKEIAEDKVEDTGDPEAARAAKFEELLKEMEELKPKKEKLEKESEKLEKLNHPLYKKLVELSKFAKEIWALFEELAAHVKEIKALKAKGAPAAEIAKAKAAANAALAKLKALAPEVEEKLEELKKVVEEILK	1.06993	89.3153
40	SpecAI_78_32938		SSEEIRQFVLDFERFWRELAALTKEFAEDKVEDTGDPVKARFKQLEEYLKRQEELEPEKKKLLEKAEELEKLNHPLYKKLVELAKFAAEVWELFKELFEYFKKLKELLEKGAPKEEIEEVLKKMEEAKAKIKALAPEVEAREAELKAVVAEILA	1.13027	89.3125
347	SpecAI_78_58783		EEEEIKQFVIDFQKFFDWLVDKTKEIAEDKVEPTGDPAAARAAKLEKLLAEFKEKKPIFKELKEKLEKLKELNHPLYKKLVEIGEKAKEIWELFEKLFAAFEKLKALKAAGAPAEEIAKAQAEMDEYKKKLQEKAPEVEKLRKEAKEVVEKILK	0.959695	89.3013
27	SpecAI_78_12586		EEEEIKQFVIDFKELFNWLAETTEEIAKDEVEDTGDPEAARAAKEEELLKKFEEKKPKFEELEKKSEKLKELDHPLYKKLVELSEKAKEIWALFEKYFAAYKELAALKAAGAPAEEIAAAEAKRDAALAELQAKAPEVKKLKEELEKVVEEILK	0.956594	89.2969
247	SpecAI_60_79000		KIKEFAEKFKKYDDWLRKKLEELKKFKIEESGDPIKELFKKLDELEKEFEKRKKEFEELLKEGEKLKELDKEEYKVIVERLELNKKIKKAFEDLIAFYKELKAKLAAGEISEEEAGKLFLEKVKEILEKNKEVLKEDEEIEPKTEEAIEKIIK	1.76228	89.2533
58	SpecAI_78_32895		EEEEIKEFVKEFEKFFNKLAELTEEFAKNEVVDTGDPEAALAERFKKLLAEFEKLKPEFEKLLEKSEKLKELNHPLYKKLVELVEFAKEVWKLFEELAAAFKELQALLAAGAPQEEIDKARAAMDAALAKIQALKPEVEKKKEELEKVVKEILE	1.26444	89.2531
135	SpecAI_78_1159		EEEEIKEWVKEFKEFFDWLADKTEEIAADPVEDTGDPEAAREAQFKKLLEELKEKEPKFKKLIEKSEELKKLNDPLYKELVELSKFMKEVWEKFKALAAAFEKLAALKAAGAPAEEIAAARAKRDAALAELKAMAPEVKERRKKLEEVVEKILK	1.15346	89.2298
175	SpecAI_78_36262		SEEEIKEFVKEFKELWDKVAALTEEFAKDEVEDTGDPAAARAAKMKKVLEELKKLEPVFKELVEKAKELKKLNHPLYKELVELAEKLVEYWKLFKALADAFKKLQELKAKGAPKAEIDKAKAEMDAALAEIKARAPEVAADRKKLEEVVAKILA	1.23931	89.1879
306	SpecAI_78_74225		EEEEILNFVKEFYEYFEWLVETTEELAADVVEPTGDPEAARAARFAKLAEEMKKRKPKFEELMKKSEELKKLNHPLYKKLVEHAEFMKEVWAKFEALAAARAALAAAKAAGAPAAEIAALAAAADAALAELKALAPEVKERREELKKVVEEILK	1.09118	89.1703
132	SpecAI_81_26512		ASSPKEALEEEEKAALPAIKAAVEKALAEDKEKFLEEWKKLFKEYKKIIEELEKEEKENIVPDTGDPEKALKKKKEEKIKLFEKLRPLFLVLSVVNEYLKEENTEENKELVKEFEELKKKWEKFKEEIIKFLSS	1.10811	89.154
204	SpecAI_78_99240		SEKKIKEFVKEFYEFFEWVVEKTEEFAADVVEDTGDPAAARAKRLDELLAELKEKKPKKEKLFEELEKLKELNHPLFKELVEIGEELKELWAKFEKLAAAFEEIKKLLAEGAPKEEIDAALAKLAAALAELKASAPKVKELREKAKKVVEKILK	0.995831	89.1456
61	SpecAI_78_72652		ESKKIKQWVKDFKEFWNWLADRTAEIAADVVEPTGDPAAARAARLEKLLEEFEKRKPIFEKLMEETEKLKKLNHPLYKKLVEISEFMKEVWELFEKMFAAFKEIAALKAAGAPQEEIDAAEAKLRAARAELKAMAPEVKAKKEELEKVVKEILE	1.31168	89.1436
17	SpecAI_78_36820		EEEEIKQFVVDFEEYWNTLVDLTKEIAADVVEPTGNPEAARDARFEKLLALLAELKPKREELFKKMEKLKELNHPLYKKLVEHAEFAKEVWALFEELAAAYRELQKLKAEGGPAEAIAAAQAARDAALAKLKALAPEVEARREDLKKVVAEILK	1.30926	89.1375
311	SpecAI_60_82411		EVKEFAKEFKEFFEELLETLEELEKAVVEPTGDPAAAVFAKLDELLAKLKEREPKFKKLKEKAEELKKLNHPEYEEIVKLFELAEKLWERLKELAAFYAELKAKLAAGEITKEEALALLLAKVAELEEKYKEVLKELKEVKPKAEEAIEKIIK	1.68797	89.1231
56	SpecAI_93_77909		EEVKEILEKLKEMEASIEEDAAAMVEAFEKFLKEKTPEAIEAFKENFEKLNDYLELLEKYLELNLVEESGDPAAAKAEQEKVLLKMLELLKPAFEGLKECGKILAELNKPEYKELVKKLKEFEERWKKLEARAAAFKAA	1.77564	89.1037
236	SpecAI_78_72512		EEEEKKEFVKEFLKFFEWLVKLTKEIAKDEVEDTGDPEAARFEKLEKLEEEFKKKKPEFEKLKKKAEELKKLNHPLYKELVKLSEFAEEVWKLFKELFEAFAALKKLLEEGGPAEEIAAARAKMEAAKKKLKEMAPEVEKREEELKKVAEEILK	1.20509	89.081
318	SpecAI_78_85879		EEEEKKQWVKDFKEFFNWLADRTAEIAADPVAPTGDPAAARAARDAELAKEREAQKPKFEELVKKSEELKKENDELYKELVELSEFAKEQWAKFDAYFAALAARRALLAAGAPAAEIAAALAAAAAARQALKDQAPEVEARREKLEEVVKKILE	1.09127	89.0388
158	SpecAI_78_17841		EEEEKKQFVKDFKEYFNWLVEHTKELAENPVEPSGDPAAALAAKLAEWLKELKELEPKWKELKEKAKKLEEENDPLYKKLVELFKFAEEVWKLHKKLAAAVEEIAKLLAEGAPKAEIDKALAAAKAALKELQALKPEVEKKKEELEKVVKEILE	2.01042	88.9871
192	SpecAI_8_9535		MEEYEEFKKELEELLKNIKEESEKIVEACKKFLETRSPEALAEFLKVFEKVYELVEKLEELKKKNPVFPSGDEEKEKKEIKEKFIEMYEYLKPAFEGIKECSKILKELNEPELEEVVKRAEELEKKWKEFEKEIEKFKKE	1.5816	88.9638
48	SpecAI_78_31520		EEEEIKEFVKEFKEFWLWLVKRTKEFAEDKVEPTGDPAAARAAREEKLLAEMEKLKPLKEKLKEKAKKLKELNHPLYKKLVELSEFMEEVWELFEEYAAAFQELKALLAEGGPQEEIDAALAKKEAALAKIKALAPEVEKKEKELEEVVKKILE	1.07117	88.9382
71	SpecAI_78_61778		AEEEKKQFVVDFKEFFDWLADTTAEIAADPVEPTGDPAAARAAKAAALLAQAKERAPLWEELKKKAEELAKLDHPLYKKLVEIAKKAEEIWAKFKALEAAFEKLAALKAAGAPAAERAAARAERDALLAELQASAPEVEKLKEEAEEVVEKILK	1.98968	88.9275
239	SpecAI_78_52018		EEEEIKQFVIDFKKYFEWVAEKTKELAADPVEPTGDPEAARRAKEAKLVEEFEKKEPEKKKLFEKAEKLKKLNHPLYKKLVEHVEFLKEWWELFKEYIKALKEIEALLASGAPQEEIDKARAKRDAALEKLKALEPEVEEKLKEVEKVVEEILK	1.04498	88.9023
30	SpecAI_78_16259		EEKEIQEWVVEFEEFFKWLVEETAREAEDVVVETGDPEKARAERREKLLAKLKEREPKWKELKEKTKELEKLNHPLYKKLVELAKFAEELWEKFKALAAAFEKIKELKAKGAPKEEIDKAKAEAAAKHAEIKALAPEAKAREKELKKVVEEILK	1.11887	88.8685
163	SpecAI_78_72453		EEEKRLQFVKDFEEFFNWLADRTAEFAADVVEETGDPEAARREQLAEFLKELEEREPKFEELKKQSEKLAELNDPLYKKLVELSKFMEEVWALIKALAAAYKKLAALEAAGAPQEEIDAARAELEAKLAEIQARAPEVAAKRAELEAVVAEILA	1.33947	88.8529
315	SpecAI_8_90886		MEKYKKFKEKLEELFKDIEETSKEIVEITERFLATRSPEDREAFVKAFEKIEKLVEELEKLKKENPKFPSGDEEKEIKKIKEKFIKMYELLKPAFEGIKKALKILEELNEPEYKELVERGKELEKKWEEFEKEIEEFKKE	1.5338	88.8506
187	SpecAI_78_40890		EEEKLKQFVVDFKEYWDWLAAHTAELAADVVEDTGDPAAARAKKMDEWAKAREERKPKFEELEKEMEKVKELNHPLFKKLVELAEFMKEVWALHDALFAAEAALKAALAAGAPQAEIDALKAKAEAALAELQARAPEVEARKAELDKVVAEILK	1.61036	88.8297
307	SpecAI_78_70944		EEEKLKKFVKDFKEFFNKLAEKTEELAADKVEPTGDPAAARAAKAAKLAEEAKADEPKFKKLMEEAEKLKELNDELFKELVEISEFAKKVWALFNELLAAEKKLAALKASGAPAAEIAAALAARDAALAKLKAMAPEVKKLKEKLEEVVEKILK	1.61619	88.8279
75	SpecAI_78_43119		EEEEIKEFVKEFEKYFNWLVELTKELAADVVEDSGDPEAARAARFAELKKEQEERKPEFEKLMEKAEKLKELNHPLYKKLVELAEYAKEVWALFEKLFAAFAEEEKLKAEGAPAAEIAAARAARDAALAELQAKAPEVEAKKKELEEVVKKILE	1.21401	88.7959
122	SpecAI_78_53014		EEEKKKKFVKDFKEYFDWLAALTAEIAEDKVEPSGDPAAEIAKREDALLAKFKEKEPIFKELKEEAEKLKKENHPLYKELVELAEFAEEIWALFKAYFAAYEKLKKLLAEGGPAAEIAAAAAERDAAKAKLQAIAPEVEARKEKLDEVVEKILK	0.917342	88.7382
209	SpecAI_78_7301		KEEEIKEFVKEFKEYFDWLVEKTKEFAEDKVEDTGDPEAARDAKMEKYEAEFKELKPKKEELEKKAEELKKLNSPLYKELVEISEKAKEIWALFEELFAAHAAEKALRAKGAPAEEIAAARAKREAAHKKIKEKAPEVEALKKKADEVVKKILE	1.20822	88.734
279	SpecAI_60_96453		DLKEFARKFKEFSDWLLEREEELKKAPVEPTGNPVLAVFKKLDKLLEELEKKKPEFEELKKKGEELKKLNDPKLEVIVKQFELDEKIWEAFEKLAKHFRELKAELAAGKISLEEAGARLKEKLKEIEEENKEVYEEREKILPEAEAAIEEIIK	2.07322	88.728
151	SpecAI_8_30316		SSEYEEFEKELEKLFEDIEKTSKEIVAITKEFLETRTPEALAKFKEAFEKIEDIIDKLEKLLEKNPILPSGDPEKEKKKIMEKFIKMFELLKPAMEGIKACAEVLKKLNTPEFKEIVKRSEELEKKWEEFEKLIKKFLEE	1.70849	88.6626
186	SpecAI_78_20004		EEEKKKQFVVDFKEFFDWLVERTQEIAANVVEETGDPAAALEAKMEEFLKELEKRKPKFEKLKAEAKELEKLGDPLYKELVELSKFAEEVWGLFKELAAAYRKLKALKAEGAPAEEIAAAEAAREAKVAQLQALAPEVEAKKAKLEEVVAKILK	1.74148	88.6599
268	SpecAI_60_63164		DVKQFAKDFKEFDEWLEERLKELEEFKVKESGDEVAEIFKQLEKFLKELEEKEPKFKELEEKAEELEKLNKPEYKVIVERAKLNKKLWEMFKELAKFVKELKAKLAAGEITKEEAYEKFLEKVKELKEKNKEVYKEREKIKPEAEKAIEKIIA	1.60445	88.6212
254	SpecAI_78_85560		EEEEIKKFVVEFEKYFKWLAEKTEEVAADVVEDTGDPAAARAAKLAKLAEEFKKKEPEFKKLKEKAEKLKELNHPLYKELVEHSEFMEEVWALFKALMAAFAALQKLKAEGAPAEEQAKAAAAAEAAKAKLKAMAPEVKARLEEVKKVVAEILK	1.17459	88.5793
8	SpecAI_78_27178		EEEEIKQFVIEFEKYFKWLADTTEEFAANKVEDTGDPEAAVAAKLDKLLAELEKRKPKFKELMEKVEKLKELNKPLFKKLVELAEFAKEVWALIEKLAAAFKELKALKASGAPQAEIDAAKAKMDAALKEIQDRAPEVKEKRKELEKVVEEILK	1.90725	88.487
109	SpecAI_78_66208		EEEEIKEFVKEFEEYFNWLIETTKEYAEDKVEDTGDPAAARAAKEAELAKKLEEKEPKFKELEEKAEELKKLNHPLYKELVELFEKAKEIWALFKELAAAEAAIKALKASGAPAAEIAAAEAKRKAALAKLKAKAPEVEKLKEKLKKVVEKILK	1.14471	88.475
117	SpecAI_60_41681		EIKEFAKELREFHDWLLEKLKELKENKVEETGDPAAALFAKLDKLLAELEEKKPKKEELFKKAEELKKLNKPEYKVIVEYSELCKKVWEMFESLAAHYKELKAKLAAGEITKEEALKLLKEHVKKLLEENEEVFKELEEVKEEFEKAVEKIIK	1.62407	88.3774
260	SpecAI_78_80823		KEEERLQFVKDFKEYFDWLVELTQELAADVVEPTGDPEAARDAKMEKLAAEAKKREPEFEKLKKKAEELKKLNHPLYKKLVEIFEFAEEVRAKLKALLAAQAALAKLRAEGAAPAEIAAALAARDAALAELQAQAPEVEKLKEELDKVVKEILA	1.22614	88.3597
78	SpecAI_78_90258		EEEKIKKFVKDFKEYWDKLVELTKEFAEDKVEETGDPAKARAEKLDKLLEEYKKDKPKFEELMKEAEKLKELNHPLFKKLVELAEFMKEVRELIEKLFEAYEKIKKLKAEGAPKEEIDKALAELNEALEKIKKLAPEVEEREKELEEVVKEILE	1.02717	88.3588
119	SpecAI_78_75148		EEEKLKKFVVEFEKYWRWLAELTKELAANPVAETGDPEAARAARFEKLLAEWEKRKPVWEELKKKAEELKKLDHPLFKKLVEHAEFAEEVRAKLSALFAAFKEIQKLKAEGAPQEQIDAAKAAAAAKLAELQAIAPEVEAREEELKKVVEEILA	2.2382	88.326
215	SpecAI_78_43384		EEEEIKKFVVEFKEFFNKLADLTEELAEDVVEPTGDPEAARDARFEKLLAELEEFKPKFEELMKKAEELKKLKHPLFEKLVELAEFAKEVWAKLEALAAAHRALAAGRAAGAPAAELAAARAAREAALAELKAMAPEVKKRKEELEKVVEKILA	1.2114	88.3086
252	SpecAI_60_86265		ELKEWAKEFQKFFDWLEERLKELKKAVVEPSGDPIAAVFAKLDEVAKEAEKKKPEFEKLKEKTKKLKELNKPELKVIVEYAELAEKIWEAFEELLAHYKELKAKLAAGEISKEEAGKLLAEKIKKIEEENKEVYKELEKIKPEAEKAIKKIIA	1.77909	88.2722
259	SpecAI_60_75175		EIKEFAKEFKEFDEWLEERLEELEEDVVEPSGNPALARFARLAELLAEMKERKPIFKELKEKAEELKKLNKEEYKVIVKRAELVEKLWKMFEELAEHYAALLAALAAGEISLEEADARYREHLKKLKEENKEVLKEYEKIKPEAEKAIKKIIE	1.15685	88.2271
253	SpecAI_78_57008		EEEEIKKFVVEFKEFFEWLVELTKELAEDKVEPTGDPAAARAARFAKLAELAKEKKPKWKELKEKAEKLKKLNHPLYKKLVELFEFAEEVWALHEKLLAAEAKLAALLAEGAPAAERAAALAARDAALAELKAKAPEVEKKKEELKKVVEEILK	1.24641	88.2026
262	SpecAI_60_18276		ELKQFAKDLKEFAKWVEETLEELEKNEVEETGDPVKALFAKLDKLLEKLKEKEPLFKKLKEKAKELKKLGKPEYKEIVKYAELLEKLWEALKELAAHFKELKAKLAAGEITLEQAGEELAKKLKEIKEENKEVYKEFKKIKPKTDEAIKKIIA	2.13408	88.1742
181	SpecAI_60_85464		EEKEFAREFKEFHDWLRELLKELEKNPIEESGDPIAEKFKKLEKLEKEFEEKKPKKEKLEEKAKELKKKGRPEYEVIVKQAELDKKIWEMLEELFKFVKELKKKLEEGKISKEEAGKLLEEKLKELKEKNKEVFEEDEKIRPEAEAAIERIIA	1.24959	88.1651
309	SpecAI_60_97977		EIKEFAKEFKEYADELEKLLKELEEFKVEESGDEAKAVFEKLKKVKEKFKELKPKFKELKEKAKELEKLNKPEYKVIVEYFKECEKIYKMLEELLKHVEELEKKLKAGEISLEKALEELKKKIKELKEENKEVYKKREKIKKEAEKAIEKIIK	1.79674	88.158
32	SpecAI_60_97951		ELKEFAKEFKEFHDKLLELEEELKKNPVEETGDPVAALFEKLDKIAEEFKELKPKYEELKKKAEELKKLNKPEYKVIVKLAELDKKIWEAFEELLKHYEELKAKLAAGKITKEEAGKELAKKLEEIEKENKEVYEERKKILPEAEKAIEEIIA	1.27602	88.1397
176	SpecAI_78_18454		KEEEIKKFVKEFEEFFKWLADRTAEIAADPVAPTGDPAAARRARAEALLAELKEREPLFKKLLAKAEELEKLNHPLYKKLVELAKFAEEVWKLFKEAAAAFAKLRELEASGAPAEERAKARAALAAAAAKLKALAPEVKAKEEELKKVVEEILK	2.0653	88.0731
50	SpecAI_78_21061		EKEEKQKFVVDFKEYFDWLVETTKEIAADKVEPTGDPRAARAAKLKELLKKMEERKPKFEELKKKMEELKKENDPLYKELVKYAEYMEEINDLFEKLFAAFKKLQALEAAGAPAAEIAKARAEMNKYRAELKALAPEVEEKKKEVEEVVEKILK	0.899966	88.0347
273	SpecAI_60_69433		EVKEWAARFKEFDDWLEERLEELEKFPVEESGNPIEEVFKKLDKYLEELKKREPIREELLKKTEELKKLNHPKYKVIVKRAELNEKIWEAFKELAKHYEELKAKLAAGEITLEEAGEEYLKKLKEIKEKNKEVYKEREEIKPEADKAIEEIIK	1.92577	87.9873
13	SpecAI_78_6406		KEEEIKKFVKEFEEFFKELAEETAALAADVVEPSGDPEAARDARFAKLLEKAKERKPKFEELMKQAEKLKELNHPLYKELVKLAEEAKKIWAKHEALFAAFKKLQELKAKGAPAEELAAARAERDAALAELKAMAPEVEALKEKLKEVVEKILK	1.20642	87.9726
337	SpecAI_78_92081		EEEEKKEFVKDFYKLWKWAAERTKEIAADPVAPTGDPAAARAAREAALAKEFEELKPKFKELKEKAEELKKENHPLYKKLVELSEYLEEVWKKFEALLAARAKIAALKAAGAPAAEIAAAKAAADAKKAELQAMAPEVEKKEKEAKEVVEEILK	2.30296	87.9702
113	SpecAI_8_40958		MEEYERFKKKLEELLKDIEEKSKEIVENTEEYLKTKTEEARKKFIESFNWFEEFLEKLEELKKENPVFPSGDEEAEKAKIKEKFIKAFELLKPAWKGLEKCAEILKKEDKPEYKELVKRWEEAKKKWEEFEKEIAKFKAE	1.45409	87.9629
242	SpecAI_78_98543		EAEEIKKFVKDFKEFFDWLVEKTKEFAADKVEPTGDPAAALAAKLAKYEEEFKEKKPKFKELKEQAEKLKELNTPLYKELVELSEYAVEVWELFEALFEAFAKLKALQAAGAPQEEIDAALAKAKEALAKIKALAPEVEERRKELEAVVKKILE	2.04165	87.8656
159	SpecAI_78_18040		AEEEKLQFVKDFEKFFKWLAEKTKEIAEDPVEPTGDPEAARRKRLEKFLEELEKKKPEFEKLKEKAEELKKENDPLYKELVELAEFAKEVWELFEKLAEAFKELEKLKAEGAPQEEIDKARKEMEEYRKKLKELAPEVKEKEKKLKEVVEKILA	1.04175	87.847
128	SpecAI_8_28036		MEEYKKFKEELEELFKNIVEDSKAIVAATEAFLANQTPEDIAAFVEAFKKVKDFVEKLEKLKEKNPVFPSGNEEEEKKKIKEKFIKAFEELKPAFEGLKKCAKILAKLNKPEYKELVKEFEELEKRWKEFEKEIEKFKKE	1.49731	87.7595
54	SpecAI_60_86753		DYKQFAKDFQKFLDWLLERLKLLKERPVVETGNPIKAVFEQLDVLLKELEEREPEFKKLMEKAEELKKLNHPDYKVIVKMAELAKKLWAMFKELAKKYKELKAKLAAGEITLEEAGKLLEEELKKLEEENKEVYKELEKVLPEAKKAIEKIIA	1.16737	87.6937
256	SpecAI_60_68288		DLKEFAKKFKEFSDWLEKLEEELEKAVVEPSGDPVAAVLARLAEVLKELEKKKPEFEELMKKIEEIKKKNTPEYKVIVKQAELDKKIWEMFERLAAHVRELEARLAAGELTPAEAGARLAEHIAKLKEENKEVFEERKKIKPEAEKAIEKIIK	1.89941	87.6927
141	SpecAI_78_59510		EEEKEKEFVKEFEKFFNKLAELTEEIAEDKVEDTGDPAAARRKKMEKLLAEFKELKPKFKELKEESEKLKKKNNELYKKLVELSEFAKEIWELFEELFAAFKELAALEAAGGPAEEIAAARAKMDEIKQKLKDLAPEVKKKKKELKKVVEEILK	1.04986	87.6621
287	SpecAI_60_83019		EVKEFAKEFKEFYDWLLETLKELEKNPVRPSGNPARELFARLDELEEEAEKRKPKWEKLEKKAEELKKLNHPKYKVIVKQWEVAKKLWAAFEELLKHYRELKAKLEAGEISEEEALELLKKKVEEIKKENAEVLKEAEEIKPEAEKAIEEIIK	1.17651	87.6478
42	SpecAI_60_2680		EVKEFAKEFKEYLEWVEELLKELKEFKVEETGDPVAAIFKKLDKVLEELKKRKPKFEELKKKGEELKELKEPKYEVIVKRLELLKKLEEALEKLAEHYKELKAKLESGEISKEEAYEELLKKVEEIEKENKEVLEELKKIKPKTEKAIKEIIA	1.70684	87.6299
88	SpecAI_60_75692		KVREFARRFKEFADWIEEELEELKKFEVEESGDPIAEVFKKHEELLKEMEERKPIKEELFKEAEELKKLNHPKYKVIVKYAELVRKLWEMFEELAKHLKELKAKLAAGEITKEEAYKLYLKKLKELEEKNKEVLEELEKIRPEAEKAIEEIIA	1.75274	87.4978
79	SpecAI_8_26276		MKEYEEFKKRLEELLKDIKKESEEIVKATKEFLETKSEEAIEKFIENFNKIKKKVDELEELLKENPVFPSGDEEKERKKIMELFIKMFEELKPAFEGIEKCLEILKKLKHPEFEEIVKEGEELKERWKKLEELKEKFLKE	2.47377	87.3966
67	SpecAI_78_64525		EEEKIKQFVIEFEKLWNKLAEKTAEFAKDVVEPTGDPEAAIAKKLAAYRAEQAELKPKKEEIIKEGEKLKELNHPLYKKLVELLEFMKEVWALFEELFAAEAALAALKAAGAPAEEIAAARAKRDAALAKIKAMAPEVEKKKEELEKVVKKILE	1.80928	87.3583
115	SpecAI_60_47884		ELKEFAKEFEKFWKKLKELLKELEENPVVETGDPAAAIFAKLDKVKAEFKELEPKFEELMKKAEELKKLNKPEYKVIVEKAELAKKIWEMLKELIKHYEELKAKLAAGEITKEQALEELKAKVKELKEKNKEVFKKAEEIEPEAEKAIKKIIE	1.16419	87.2732
72	SpecAI_78_24309		KEEEIKKFVKDFEEFFNWLAERTEEIAEDRVEPAGDPAAARAARLDALAAEAAERAPIFKKLKEKSEELKKLNNELYKELVKISEFAEKVWAKFEALLAKRAALAAARAAGAAPAEIAALAAAAAAAAAELKDMAPEVKEKKKELEEVVKKILE	2.03006	87.2629
225	SpecAI_78_19145		EEEKLKQWVIDFEKYWNWLVARTAEYAANPVAPTGDPEAARAEREEKLLEELKKFEPEFKKLMEETEKLKKLNHPLYKKLVELSEFMKEVKALFDERAAAYAKLKALLAEGAPAEEIAAAKAAYDAALAKIQALAPEVEARKAELDEVVKKILE	1.26055	87.1681
28	SpecAI_60_13922		SVREFARRFKEFVDWLLELLKELKEFKVEESGNPEAALFEKLDEILKELEKRKPEFEELKKEAERLKELNHPEFKVIVELSELAVKLWEMFEKLAEKYKELKELLEKGEISLEEAYERYLEKVKELEEENKEVYKKLEEILPEAEEAIERIIA	1.09843	87.0986
312	SpecAI_78_72402		EEEKKKQFVKDFEEYFNWLAEKTKEIAADVVEPTGDPAAARAAREAKLAEEQKELKPKFEELVKEAEKLKEENDELYKELVKLFEFAKEVWAKFEAYFAAAAALAALRAAGAPAADRAAAAAARAAARAELKAMAPEVEKKKEELEKVVKKILE	0.984425	87.0513
167	SpecAI_78_63547		EEEEIKNFVKEFEEFFNKLAEKTKEIAKNVVEPTGDPAAAKAAQMDKWKAEMEKDKPKFKELEKKAEELKKLNHPLFKELVELSEFAKEIWADFEALFAAYDKIAALRAAGAAAADIAAAEAAAAAALKKLQEKAPEVEKKKEKLKEVVEKILK	1.46782	86.9632
110	SpecAI_78_72228		EEEKIKEFVVNFEKYFKWLAERTAELAADPVAPTGDPAAARAARAAALLEERAKRAPEWEKLKKEAEKLKKLNDPLYKELVKLAEYADEVQALFDALAAAGARLAALRAEGAPAAERAAAAAAAAAALAALQARAPEVEKKKEELEKVVEKILK	1.97882	86.9593
90	SpecAI_60_1908		EIKEWAKEFREFFEKLEELLEELEKNELKESGNEIEELFKKLDELLKELEKLKPKFEELKKKSEELKKLNHPEYKVIVERFEEAEKLWEALEELAKKYKELKEKLESGEISLEEAGKLYKEKVKEIKEKNKEVYKKLKEIKPEAEKAIEKIIK	1.75345	86.7063
245	SpecAI_8_48668		AAAAAAFEARVAALLADLEKDSEKIVENCEKFLKENTPEARKKFIEDFEKLSDFLARLRALLAEDPVLPSGDPEAARAALLARFERAAELLKPAFEGLKKCTKILKKLKKPEYEELVKKAEEDEKVWAELEALLAEAKAA	1.84405	86.6071
297	SpecAI_60_14476		ELKEWAKELQEYGDWVLERLEELAARPVEPSGDPVAAVFARLDVLLEELKERKPKFEELKKKSEKIKELNKPELKVLVKYSELLEKLWKAFEELAAHYKELKAKLAAGEITKEQAGAELRKKVAEILAKNKEVLEELKKILPEAKKAIEKLIK	1.33207	86.5903
278	SpecAI_60_94636		EVKEFAKKFKEYFNWLLERLKELKEFKVEPTGDPAAAVFAKLDKLLEEMKERKPEFKELMEKSEKLKELNKEEYKEIVKMSELAKKLWEMFEELAEHFEELKAKLAAGEITKEEALALLLEKVKELLEKNKEVLKETEEVLEKTLKAIEKIIE	1.21049	86.42
293	SpecAI_60_58300		DDKEFAKEFKEFSDWLDELEEKLKKNPVEPSGNPILEKFKQLEELLKEKEERKPKKEELAKKAEELKKKNKEEYKIIVEQFEIDKKLWEMFEELFKKFKELKEKLKKGEISLEEAGELYDKKLKELEEKNKEVFKERKEIKEKAEKAIEKIIA	1.33132	86.3273
188	SpecAI_8_22559		MEEEERFKKKLEELLKDIEKTSEEIVKNTAEFLKTNSPEARKKFIKDFEKINKIIKELKELLKENPVFESGDPEKEIKEIEEKFLKMLELLKPAMEGIFKCAEILKKLDKPEYKKIVEEIEELKKEWEEFEERAKKFKEE	1.4077	86.2899
207	SpecAI_8_88939		EEELKKFEEELEELLKNIEEESAEIVAATEEYLKTRSPEAREKFKEVFDKVEEFVKKLEELKKKNPVFPSGNEEEEKRKIEEKFLEAFEKLKPAFEGIKKCAEILKEEKTPEDEELVKRFEELEKKWKEFEKEAEEFRKK	1.91879	86.1389
336	SpecAI_78_3658		EKEELLQFVKDFEEFFNWLAERTEEIAEDKVEDTGDPEAARAKKLEELLEKLKELKPKKKELEAKMKKLKELNHPLYKELVEISEKAKEIWELFEKMAEAFEKIKKLKAEGGPEEEIKKALEELEKVKEELKKLKPEVEKLKEKLKKVVKEILA	1.40562	85.976
112	SpecAI_78_51226		EEEEEKEFVKEFEEFFNWLVETTKAIAEDVVEPAGDPAAARDRRFDALAAEAKEREAKFKELMEKGEKLEKKNHPLYKKLVEILKKAKEVWAQFQALLAARAALKALKAAGAPAAERAAAAAARDAALAALKAQAPEVEKLKEELKKVVEEILK	1.12463	85.8797
271	SpecAI_8_10272		EKEYEEFEKKLEELLENIEEESKEIVEACEAFLKNKTPEDIEKFLEVFEKIYELVEKLEELKKENPIFPSGDPEKEKEKIKEKFLKMFELLKPAMEGIFKCTEILKKLDKPEYKEVVKKAEELKKKWEEFKKEREEFLKK	2.74495	85.8166
272	SpecAI_93_18179		MEKEKILKKLKEIEENIEKLTKEIVEKTKAFLETKTPEDIAAFVEAFKEIKEIIELLEKYLELNLVEESGDPEKAVKEKMEKLLKMLELLKPAKEGIKKCTKVLAKLKKPEYEKLVKEAKELEKRWKKFEELAAKFKKE	2.16229	84.9977
92	SpecAI_81_91533		LSSPEEALKKEEEKLLPKIKELVEKLLSKNEEETLKKWKEEFKKFKEIIEKLEKLRKLNIVPDFGNPELAKKLFELIVLLLLKILLPKYLLLEELNKYVKERNTEEDKKLVEEFEEVKKKYEKILEEAVKFLSS	1.71277	84.7915
116	SpecAI_93_34194		SELEEILKKLEEFFKNIEATAAEIVAKTAAFLATKSPADRAAFIEAFETFNELLDLLEKYKEYNIVEPTGDPELAKKKKKEKILKMFELLEPAFEGLKKAAEELAKLNTPEYKKLVEKFKEAEKRWEKFKKEKEEFLKE	1.62168	84.3196
82	SpecAI_8_75091		MEEYEEFKKKLEELFKNIKADSAAAVAATAAFLATQSDADEAAFLTVFDKIKKWVEEYEELLKKNPVFPSGDEEKEKKEIEKKFLEALKEMEPAMKGVFACAEVLKKKDKPEYKKVVEEAEELKKKWEKIKKKAEKFEKE	2.18588	83.9203
185	SpecAI_8_12823		MKKEEEFKKKLEELFKDIDETTAAIVAAAAEFLATQSPAARAAFREAFAKVEKFVEEYEELKKENPVFESGDPEAEKKKIQEKFLEAFEKLKPAFAGLAACARILAARARPEDAELVARFAELEKRWAKFEKEAAEFKKK	2.31685	83.5239
131	SpecAI_8_86410		MKKYEEFKKRLEELFKDIEEKSKEIIEKTKAFLATRSEEDREAFIKAFEKIEKFFEELEKLRKENPVLPSGDEEKEKKKIKEKFIKAFEKLKPAFEGLKAAAKILKELDKPEYKELVKRFEELEKKWEEFKKEIEKFKKE	9.18548	78.1489
310	SpecAI_8_23582		MEEEEKFKKRLEELLKDIEAWSAEAVAACAAFLANKTPEERAKFLEVFERFNKFLEELEELKKENPTFESGDPEKEKKKIQEKFIKAFELLKPAWEGIKACVAELKKLNKPEYKKVVEKAEEAEKKWAEFEEEIKKFKEE	8.43727	74.1146
